# Supplementary material
Source: MDPI journal article supplement (https://www.mdpi.com/2304-6740/10/12/263)
Supplement: s1 [file s1]

# Yttrium and lithium complexes with diamidophosphane ligand bearing 2,1,3-benzothiazolyl substituent: Polydentate complexation and reversible NH–PH tautomerism

by Radmir M. Khisamov, Taisiya S. Sukhikh, Sergey N. Konchenko, Nikolay A. Pushkarevsky

|                                                                                                                                                                                                                                                           |    |
|-----------------------------------------------------------------------------------------------------------------------------------------------------------------------------------------------------------------------------------------------------------|----|
| Figure S1. Residual electron density map for compounds $2_2 \cdot \text{Et}_2\text{O}$ (a) and $[\text{Y}_2(\mu\text{-dioxane})] \cdot \text{dioxane}$ (b) in the absence of the hydrogen at the P atom.....                                              | 2  |
| Table S1. M–N (M = Li, Y) and P–N bonds (Å) in the compounds .....                                                                                                                                                                                        | 2  |
| Figure S2. UV-Vis spectra of concentrated (top spectra; $8.9 \cdot 10^{-5}$ – $7.8 \cdot 10^{-4}$ M) and diluted (bottom spectra; $1.7 \cdot 10^{-5}$ – $1.2 \cdot 10^{-4}$ M) solutions of the compounds .....                                           | 3  |
| Table S2. Frank-Condon (vertical) $S_0$ – $S_n$ (n = 1–20) transitions of $[\text{YL}_2]^-$ .....                                                                                                                                                         | 4  |
| Table S3. Frank-Condon (vertical) $S_0$ – $S_n$ (n = 1–20) transitions of $[\{\text{Y}(\text{HL})\text{L}\}_2(\text{dioxane})]$ .....                                                                                                                     | 6  |
| Table S4. Frank-Condon (vertical) $S_0$ – $S_n$ (n = 1–20) transitions of $[\text{Li}(\text{H}^{\text{P}}\text{L})]_2$ .....                                                                                                                              | 8  |
| Table S5. Frank-Condon (vertical) $S_0$ – $S_n$ (n = 1–20) transitions of $[\text{Li}(\text{H}^{\text{N}}\text{L})(\text{thf})_2]$ .....                                                                                                                  | 10 |
| Figure S3. Frontier molecular orbitals for the complexes $[\{\text{Y}(\text{HL})\text{L}\}_2(\text{dioxane})]$ .....                                                                                                                                      | 12 |
| Figure S4. Comparison of the computed electronic transitions for the models $[\text{Li}(\text{H}^{\text{P}}\text{L})]_2$ (gray bars) and $[\text{Li}(\text{H}^{\text{N}}\text{L})(\text{thf})_2]$ (red bars) with different positions of the proton ..... | 13 |
| Figure S5. Frontier molecular orbitals for .....                                                                                                                                                                                                          | 13 |
| Table S6. Crystal data and structure refinement for the compounds .....                                                                                                                                                                                   | 14 |
| $^1\text{H}$ and $^{31}\text{P}$ NMR spectra of the compounds .....                                                                                                                                                                                       | 15 |
| IR spectra of the compounds .....                                                                                                                                                                                                                         | 21 |

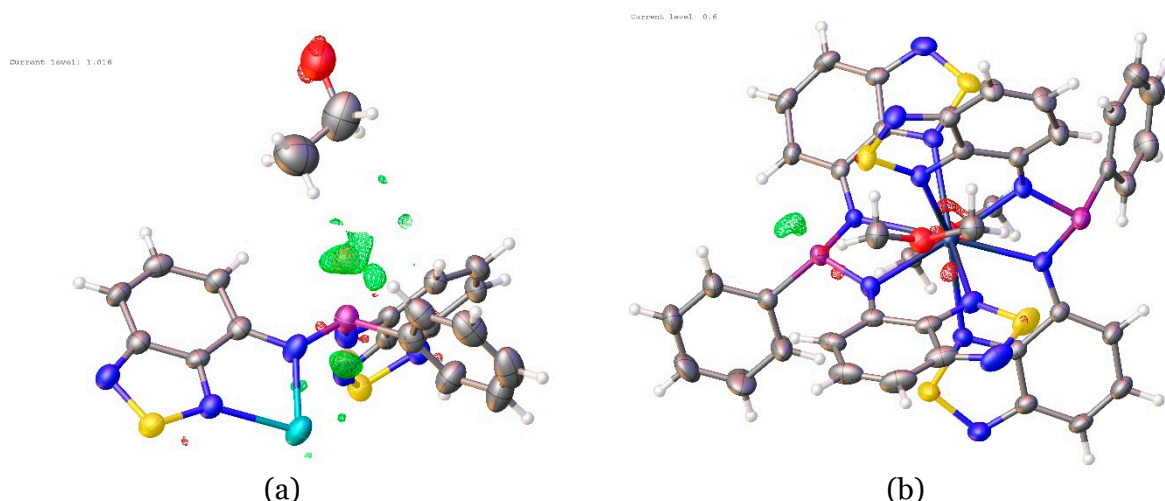

Figure S1. Residual electron density map for compounds **2**·Et<sub>2</sub>O (a) and [5·(μ-dioxane)]·dioxane (b) in the absence of the hydrogen at the P atom. Green area indicate the excess of the electron density, red area indicate the lack of the electron density.

Table S1. M–N (M = Li, Y) and P–N bonds (Å) in the compounds. For disordered units, only the major components are listed.

| 2 <sub>2</sub> ·Et <sub>2</sub> O |                  |          |    | 4 <sub>2</sub> ·Et <sub>2</sub> O |          |    |    | 5 <sub>2</sub> ·(μ-dioxane)·dioxane |    |                 |          | 6·hexane |     |          |          | 6·1.5thf        |          |    |    |          |
|-----------------------------------|------------------|----------|----|-----------------------------------|----------|----|----|-------------------------------------|----|-----------------|----------|----------|-----|----------|----------|-----------------|----------|----|----|----------|
| N2                                | Li1              | 2.253(8) | Y1 | N2                                | 2.545(3) | Y1 | N1 | 2.496(2)                            | Y1 | N2              | 2.582(4) | Y1       | N2  | 2.543(5) | Y1       | N3              | 2.384(5) | Y1 | N5 | 2.557(6) |
| N3                                | Li1              | 2.030(9) | Y1 | N3                                | 2.333(3) | Y1 | N2 | 2.631(2)                            | Y1 | N2 <sup>3</sup> | 2.582(4) | Y1       | N3  | 2.371(4) | Y1       | N3              | 2.374(5) | Y1 | N6 | 2.374(5) |
| N5                                | Li1 <sup>1</sup> | 2.111(8) | Y1 | N5                                | 2.580(3) | Y1 | N3 | 2.674(2)                            | Y1 | N3 <sup>3</sup> | 2.371(4) | Y1       | N5  | 2.544(4) | Y1       | N5 <sup>3</sup> | 2.544(4) | Y1 | N8 | 2.582(5) |
| N6                                | Li1 <sup>1</sup> | 2.065(8) | Y1 | N6                                | 2.320(3) | Y1 | N4 | 2.388(2)                            | Y1 | N3              | 2.371(4) | Y1       | N6  | 2.372(2) | Y1       | N6 <sup>3</sup> | 2.389(4) | Y1 | N9 | 2.371(5) |
|                                   |                  |          | Y1 | N7                                | 2.221(4) | Y1 | N5 | 2.611(2)                            | Y1 | N5              | 2.544(4) | Y1       | N8  | 2.523(6) | Y1       | N11             | 2.523(6) |    |    |          |
|                                   |                  |          | Y2 | N9                                | 2.534(3) | Y1 | N6 | 2.372(2)                            | Y1 | N5 <sup>3</sup> | 2.544(4) | Y1       | N9  | 2.371(5) | Y1       | N12             | 2.371(5) |    |    |          |
|                                   |                  |          | Y2 | N10                               | 2.377(3) | Y1 | N7 | 2.450(2)                            | Y1 | N6 <sup>3</sup> | 2.389(4) | Y1       | N11 | 2.523(6) | Y1       | N12             | 2.371(5) |    |    |          |
|                                   |                  |          | Y2 | N12                               | 2.536(3) | Y1 | N8 | 2.540(2)                            | Y1 | N6              | 2.388(4) | Y1       | N12 | 2.371(5) | Y1       | N12             | 2.371(5) |    |    |          |
|                                   |                  |          | Y2 | N13                               | 2.491(3) |    |    |                                     |    |                 |          |          |     |          |          |                 |          |    |    |          |
|                                   |                  |          | Y2 | N14                               | 2.265(3) |    |    |                                     |    |                 |          |          |     |          |          |                 |          |    |    |          |
| P1                                | N3               | 1.598(4) | P1 | N3                                | 1.645(4) | P1 | N1 | 1.599(2)                            | P1 | N3              | 1.685(4) | P1       | N3  | 1.702(5) |          |                 |          |    |    |          |
| P1                                | N6               | 1.598(4) | P1 | N6                                | 1.660(4) | P1 | N7 | 1.602(2)                            | P1 | N6              | 1.691(4) | P1       | N6  | 1.695(5) |          |                 |          |    |    |          |
|                                   |                  |          | P3 | N10                               | 1.677(5) | P2 | N4 | 1.691(2)                            |    |                 |          |          | P2  | N9       | 1.692(5) |                 |          |    |    |          |
|                                   |                  |          | P3 | N13                               | 1.701(4) | P2 | N6 | 1.697(2)                            |    |                 |          |          | P2  | N12      | 1.701(5) |                 |          |    |    |          |

<sup>1</sup>1-x, y, 1/2-z; <sup>2</sup>1-x, -1-y, 4-z; <sup>3</sup>1-x, y, 3/2-z.

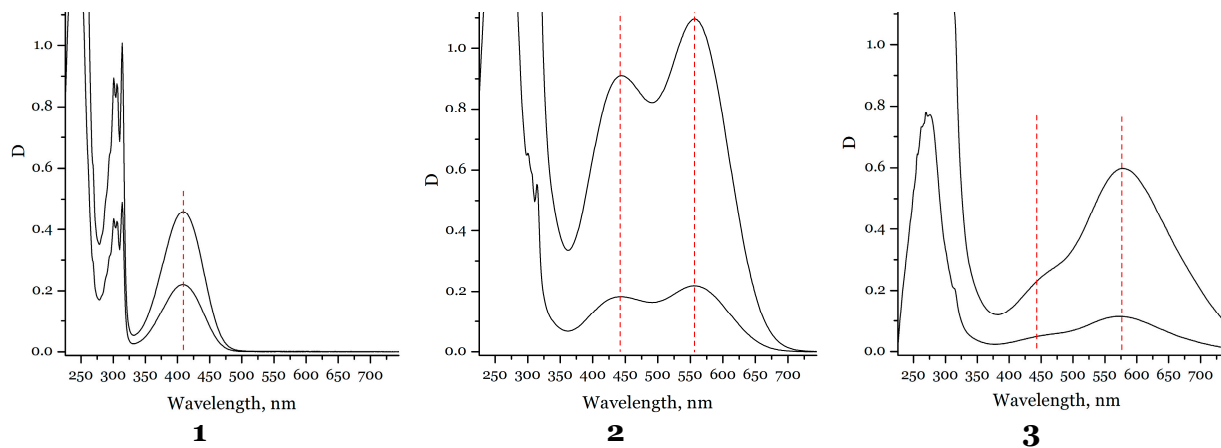

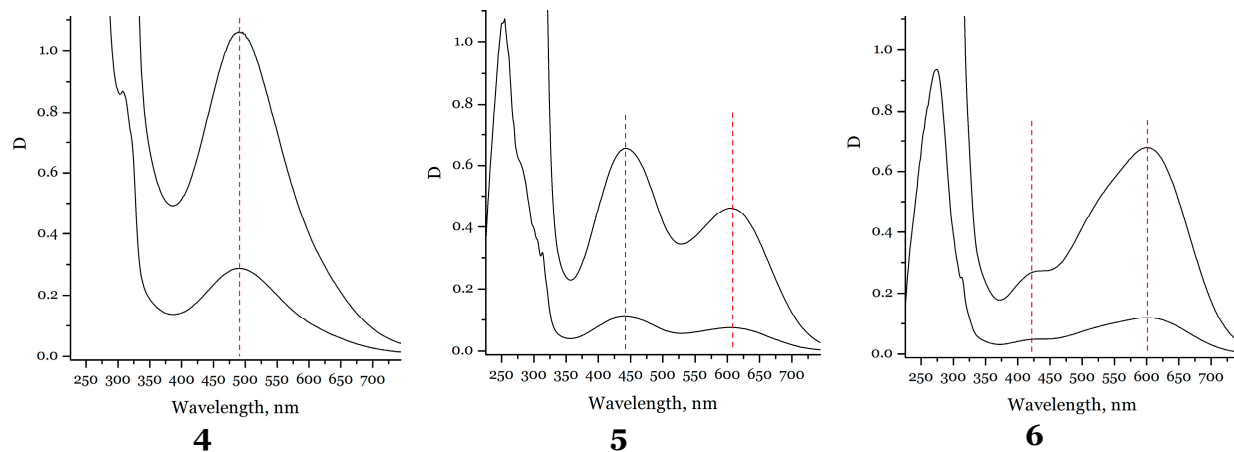

**4** **5** **6**  
 Figure S2. UV-Vis spectra of concentrated (top spectra;  $8.9 \cdot 10^{-5}$  –  $7.8 \cdot 10^{-4}$  M) and diluted (bottom spectra;  $1.7 \cdot 10^{-5}$  –  $1.2 \cdot 10^{-4}$  M) solutions of the compounds. Vertical dashed lines indicate the positions of the long wavelength bands.

Table S2. Frank-Condon (vertical)  $S_0-S_n$  ( $n = 1-20$ ) transitions of  $[YL_2]^-$  (TD-PBE0/def2-TZVPD level, geometry was optimized at PBE0-D3BJ/def2-SVPD)

| State | Energy, cm <sup>-1</sup> | Wavelength, nm | Oscillator strength | Transitions | Contributions |
|-------|--------------------------|----------------|---------------------|-------------|---------------|
| 1     | 15520.6                  | 644.3          | 0.044986123         | H → L       | 0.018984      |
|       |                          |                |                     | H → L       | 0.017465      |
|       |                          |                |                     | H → L       | 0.932314      |
| 2     | 16038.6                  | 623.5          | 0.041626802         | H → L       | 0.229340      |
|       |                          |                |                     | H → L + 1   | 0.017775      |
|       |                          |                |                     | H → L       | 0.722730      |
| 3     | 16648.3                  | 600.7          | 0.003842003         | H → L       | 0.718426      |
|       |                          |                |                     | H → L       | 0.207879      |
|       |                          |                |                     | H → L + 1   | 0.022366      |
|       |                          |                |                     | H → L       | 0.011839      |
|       |                          |                |                     | H → L + 2   | 0.011562      |
| 4     | 17347.3                  | 576.5          | 0.003218488         | H → L       | 0.251520      |
|       |                          |                |                     | H → L + 2   | 0.031013      |
|       |                          |                |                     | H → L + 1   | 0.013007      |
|       |                          |                |                     | H → L + 2   | 0.047606      |
|       |                          |                |                     | H → L + 1   | 0.614870      |
| 5     | 17783.9                  | 562.3          | 0.005445304         | H → L       | 0.105198      |
|       |                          |                |                     | H → L + 2   | 0.017390      |
|       |                          |                |                     | H → L + 1   | 0.190591      |
|       |                          |                |                     | H → L + 2   | 0.025342      |
|       |                          |                |                     | H → L + 1   | 0.092014      |
|       |                          |                |                     | H → L + 2   | 0.495518      |
| 6     | 18042.6                  | 554.2          | 0.049178960         | H → L + 3   | 0.046746      |
|       |                          |                |                     | H → L       | 0.028943      |
|       |                          |                |                     | H → L + 2   | 0.023139      |
|       |                          |                |                     | H → L + 1   | 0.077855      |
|       |                          |                |                     | H → L + 2   | 0.010271      |
|       |                          |                |                     | H → L       | 0.012692      |
|       |                          |                |                     | H → L + 1   | 0.544772      |
|       |                          |                |                     | H → L + 2   | 0.081674      |
|       |                          |                |                     | H → L + 3   | 0.011223      |
|       |                          |                |                     | H → L + 1   | 0.012063      |
| 7     | 18173.6                  | 550.2          | 0.028270641         | H → L + 2   | 0.117123      |
|       |                          |                |                     | H → L + 3   | 0.053808      |
|       |                          |                |                     | H → L       | 0.187940      |
|       |                          |                |                     | H → L + 1   | 0.124410      |
|       |                          |                |                     | H → L + 2   | 0.291867      |
| 8     | 18453.4                  | 541.9          | 0.014236485         | H → L + 1   | 0.151075      |
|       |                          |                |                     | H → L + 2   | 0.208086      |
|       |                          |                |                     | H → L       | 0.256124      |
|       |                          |                |                     | H → L + 1   | 0.039091      |
|       |                          |                |                     | H → L + 2   | 0.011734      |
|       |                          |                |                     | H → L       | 0.010935      |
|       |                          |                |                     | H → L + 1   | 0.197988      |
|       |                          |                |                     | H → L + 2   | 0.012246      |
|       |                          |                |                     | H → L + 1   | 0.018948      |
|       |                          |                |                     | H → L + 2   | 0.224811      |
|       |                          |                |                     | H → L + 3   | 0.055913      |
|       |                          |                |                     | H → L + 1   | 0.045473      |
| 9     | 18489.7                  | 540.8          | 0.026823814         | H → L + 2   | 0.052362      |
|       |                          |                |                     | H → L + 3   | 0.043429      |
|       |                          |                |                     | H → L       | 0.089968      |
|       |                          |                |                     | H → L + 1   | 0.044508      |
|       |                          |                |                     | H → L + 2   | 0.015364      |
|       |                          |                |                     | H → L + 3   | 0.011141      |
|       |                          |                |                     | H → L       | 0.012226      |
|       |                          |                |                     | H → L + 1   | 0.188527      |
|       |                          |                |                     | H → L + 2   | 0.051192      |

|    |         |       |             |                           |          |
|----|---------|-------|-------------|---------------------------|----------|
|    |         |       |             | $H \rightarrow L + 1$     | 0.128720 |
|    |         |       |             | $H \rightarrow L + 2$     | 0.138009 |
|    |         |       |             | $H \rightarrow L + 3$     | 0.270938 |
| 10 | 18725.0 | 534.0 | 0.063804064 | $H \rightarrow L$         | 0.034775 |
|    |         |       |             | $H \rightarrow L + 1$     | 0.016343 |
|    |         |       |             | $H \rightarrow L + 1$     | 0.022710 |
|    |         |       |             | $H \rightarrow L + 2$     | 0.519294 |
|    |         |       |             | $H \rightarrow L + 3$     | 0.126768 |
|    |         |       |             | $H \rightarrow L + 1$     | 0.036755 |
|    |         |       |             | $H \rightarrow L + 2$     | 0.072986 |
|    |         |       |             | $H \rightarrow L + 3$     | 0.105058 |
|    |         |       |             | $H \rightarrow L + 1$     | 0.039390 |
| 11 | 19122.7 | 522.9 | 0.001105243 | $H \rightarrow L + 2$     | 0.051794 |
|    |         |       |             | $H \rightarrow L + 1$     | 0.338771 |
|    |         |       |             | $H \rightarrow L + 2$     | 0.035389 |
|    |         |       |             | $H \rightarrow L + 1$     | 0.018183 |
|    |         |       |             | $H \rightarrow L + 2$     | 0.034706 |
|    |         |       |             | $H \rightarrow L + 3$     | 0.018228 |
|    |         |       |             | $H \rightarrow L + 2$     | 0.072640 |
|    |         |       |             | $H \rightarrow L + 3$     | 0.408394 |
| 12 | 19497.6 | 512.9 | 0.000310298 | $H \rightarrow L + 1$     | 0.256764 |
|    |         |       |             | $H \rightarrow L + 2$     | 0.015854 |
|    |         |       |             | $H \rightarrow L + 2$     | 0.257007 |
|    |         |       |             | $H \rightarrow L + 2$     | 0.032789 |
|    |         |       |             | $H \rightarrow L + 3$     | 0.391007 |
|    |         |       |             | $H \rightarrow L + 2$     | 0.012686 |
| 13 | 19958.0 | 501.1 | 0.000375698 | $H \rightarrow L + 1$     | 0.457062 |
|    |         |       |             | $H \rightarrow L + 2$     | 0.017188 |
|    |         |       |             | $H \rightarrow L + 2$     | 0.042523 |
|    |         |       |             | $H \rightarrow L + 3$     | 0.267295 |
|    |         |       |             | $H \rightarrow L + 2$     | 0.031819 |
|    |         |       |             | $H \rightarrow L + 3$     | 0.118037 |
|    |         |       |             | $H \rightarrow L + 3$     | 0.028099 |
| 14 | 20272.4 | 493.3 | 0.005964629 | $H - 1 \rightarrow L$     | 0.010106 |
|    |         |       |             | $H \rightarrow L + 2$     | 0.796792 |
|    |         |       |             | $H \rightarrow L + 3$     | 0.078616 |
|    |         |       |             | $H \rightarrow L + 3$     | 0.080250 |
| 15 | 20283.1 | 493.0 | 0.005352692 | $H \rightarrow L + 1$     | 0.131875 |
|    |         |       |             | $H \rightarrow L + 2$     | 0.024436 |
|    |         |       |             | $H \rightarrow L + 3$     | 0.580905 |
|    |         |       |             | $H \rightarrow L + 3$     | 0.195826 |
|    |         |       |             | $H \rightarrow L + 3$     | 0.031800 |
| 16 | 21541.0 | 464.2 | 0.006780555 | $H \rightarrow L + 3$     | 0.940740 |
| 17 | 23422.5 | 426.9 | 0.001838889 | $H - 1 \rightarrow L$     | 0.966630 |
| 18 | 24834.2 | 402.7 | 0.000495399 | $H - 2 \rightarrow L$     | 0.970025 |
| 19 | 25191.4 | 397.0 | 0.000949699 | $H - 2 \rightarrow L + 2$ | 0.015592 |
|    |         |       |             | $H - 1 \rightarrow L + 1$ | 0.934567 |
|    |         |       |             | $H - 1 \rightarrow L + 2$ | 0.016065 |
|    |         |       |             | $H \rightarrow L + 3$     | 0.010893 |
| 20 | 25537.9 | 391.6 | 0.000008970 | $H - 2 \rightarrow L + 1$ | 0.042204 |
|    |         |       |             | $H - 1 \rightarrow L + 1$ | 0.014264 |
|    |         |       |             | $H - 1 \rightarrow L + 2$ | 0.908005 |

Table S3. Frank-Condon (vertical)  $S_0-S_n$  ( $n = 1-20$ ) transitions of  $[Y(HL)L]_2(\text{dioxane})$  (TD-PBEO/def2-TZVPD level; geometry was optimized at PBEO-D3BJ/def2-SVP)

| State | Energy, cm <sup>-1</sup> | Wavelength, nm | Oscillator strength | Transitions   | Contributions |
|-------|--------------------------|----------------|---------------------|---------------|---------------|
| 1     | 14184.4                  | 705.0          | 0.008511733         | H → L         | 0.033468      |
|       |                          |                |                     | H → L         | 0.900561      |
|       |                          |                |                     | H → L + 1     | 0.044827      |
| 2     | 14655.3                  | 682.3          | 0.007147318         | H - 1 → L + 1 | 0.059865      |
|       |                          |                |                     | H - 1 → L     | 0.076881      |
|       |                          |                |                     | H - 1 → L + 1 | 0.766837      |
|       |                          |                |                     | H - 1 → L + 3 | 0.049444      |
| 3     | 14723.0                  | 679.2          | 0.008175342         | H - 1 → L + 1 | 0.112016      |
|       |                          |                |                     | H - 1 → L + 3 | 0.839225      |
| 4     | 14778.8                  | 676.6          | 0.017375322         | H - 1 → L + 2 | 0.030718      |
|       |                          |                |                     | H - 1 → L + 1 | 0.023297      |
|       |                          |                |                     | H - 1 → L + 2 | 0.909011      |
| 5     | 15375.8                  | 650.4          | 0.002860398         | H - 1 → L + 3 | 0.033845      |
|       |                          |                |                     | H → L         | 0.022418      |
|       |                          |                |                     | H → L + 1     | 0.259737      |
|       |                          |                |                     | H → L + 2     | 0.011880      |
|       |                          |                |                     | H → L + 3     | 0.600086      |
|       |                          |                |                     | H → L + 1     | 0.011487      |
| 6     | 15525.6                  | 644.1          | 0.001015699         | H → L + 3     | 0.024211      |
|       |                          |                |                     | H - 1 → L + 1 | 0.060207      |
|       |                          |                |                     | H - 1 → L + 2 | 0.811866      |
|       |                          |                |                     | H → L + 2     | 0.067618      |
|       |                          |                |                     | H → L + 2     | 0.034089      |
|       |                          |                |                     | H → L + 4     | 0.011250      |
| 7     | 15774.6                  | 633.9          | 0.001637870         | H → L         | 0.726301      |
|       |                          |                |                     | H → L + 1     | 0.018564      |
|       |                          |                |                     | H → L + 3     | 0.093279      |
|       |                          |                |                     | H → L         | 0.044157      |
|       |                          |                |                     | H → L         | 0.050165      |
|       |                          |                |                     | H → L + 1     | 0.045863      |
| 8     | 15887.0                  | 629.4          | 0.000316019         | H - 1 → L     | 0.016180      |
|       |                          |                |                     | H → L         | 0.107184      |
|       |                          |                |                     | H → L + 1     | 0.378548      |
|       |                          |                |                     | H → L + 3     | 0.194458      |
|       |                          |                |                     | H → L         | 0.052670      |
|       |                          |                |                     | H → L + 1     | 0.178742      |
| 9     | 15964.4                  | 626.4          | 0.000289192         | H → L + 3     | 0.028798      |
|       |                          |                |                     | H - 1 → L     | 0.507417      |
|       |                          |                |                     | H → L         | 0.053429      |
|       |                          |                |                     | H → L + 1     | 0.029694      |
|       |                          |                |                     | H → L         | 0.373070      |
|       |                          |                |                     | H → L + 1     | 0.014727      |
| 10    | 16246.1                  | 615.5          | 0.002337747         | H - 1 → L     | 0.017567      |
|       |                          |                |                     | H - 1 → L + 1 | 0.753828      |
|       |                          |                |                     | H - 1 → L + 2 | 0.048725      |
|       |                          |                |                     | H - 1 → L + 3 | 0.046890      |
|       |                          |                |                     | H - 1 → L + 1 | 0.091786      |
| 11    | 16946.5                  | 590.1          | 0.003753251         | H - 1 → L + 1 | 0.012448      |
|       |                          |                |                     | H → L         | 0.014420      |
|       |                          |                |                     | H → L + 1     | 0.226627      |
|       |                          |                |                     | H → L + 3     | 0.033056      |
|       |                          |                |                     | H → L         | 0.040936      |
|       |                          |                |                     | H → L + 1     | 0.553227      |
| 12    | 17220.9                  | 580.7          | 0.001252318         | H → L + 3     | 0.054249      |
|       |                          |                |                     | H → L + 5     | 0.022349      |
|       |                          |                |                     | H - 1 → L     | 0.436720      |
|       |                          |                |                     | H - 1 → L + 1 | 0.042839      |
|       |                          |                |                     | H → L         | 0.031117      |
|       |                          |                |                     | H → L         | 0.433525      |
| 13    | 17618.3                  | 567.6          | 0.029373532         | H → L + 1     | 0.034179      |
|       |                          |                |                     | H - 1 → L + 4 | 0.434232      |
|       |                          |                |                     | H - 1 → L + 5 | 0.014555      |
|       |                          |                |                     | H → L + 4     | 0.010956      |
|       |                          |                |                     | H → L + 5     | 0.083180      |

|    |         |       |             |                           |          |
|----|---------|-------|-------------|---------------------------|----------|
| 14 | 17670.8 | 565.9 | 0.128829624 | $H \rightarrow L + 6$     | 0.367087 |
|    |         |       |             | $H \rightarrow L + 7$     | 0.045691 |
|    |         |       |             | $H - 1 \rightarrow L + 4$ | 0.024739 |
|    |         |       |             | $H - 1 \rightarrow L + 5$ | 0.033827 |
|    |         |       |             | $H \rightarrow L + 1$     | 0.010974 |
|    |         |       |             | $H \rightarrow L + 4$     | 0.053125 |
|    |         |       |             | $H \rightarrow L + 5$     | 0.312605 |
|    |         |       |             | $H \rightarrow L + 4$     | 0.030301 |
|    |         |       |             | $H \rightarrow L + 6$     | 0.058986 |
|    |         |       |             | $H \rightarrow L + 5$     | 0.065681 |
| 15 | 17772.4 | 562.7 | 0.015949152 | $H \rightarrow L + 7$     | 0.365759 |
|    |         |       |             | $H - 1 \rightarrow L + 4$ | 0.044885 |
|    |         |       |             | $H - 1 \rightarrow L + 6$ | 0.082589 |
|    |         |       |             | $H - 1 \rightarrow L + 4$ | 0.743149 |
|    |         |       |             | $H - 1 \rightarrow L + 5$ | 0.042672 |
|    |         |       |             | $H - 1 \rightarrow L + 5$ | 0.018509 |
| 16 | 17883.1 | 559.2 | 0.022105128 | $H - 1 \rightarrow L + 7$ | 0.013521 |
|    |         |       |             | $H - 1 \rightarrow L + 5$ | 0.016319 |
|    |         |       |             | $H \rightarrow L + 4$     | 0.021491 |
|    |         |       |             | $H \rightarrow L + 5$     | 0.152167 |
|    |         |       |             | $H \rightarrow L + 7$     | 0.075622 |
|    |         |       |             | $H \rightarrow L + 1$     | 0.016365 |
|    |         |       |             | $H \rightarrow L + 2$     | 0.060364 |
|    |         |       |             | $H \rightarrow L + 4$     | 0.067064 |
|    |         |       |             | $H \rightarrow L + 5$     | 0.544939 |
|    |         |       |             | $H \rightarrow L + 2$     | 0.020263 |
| 17 | 17948.1 | 557.2 | 0.001298013 | $H \rightarrow L + 1$     | 0.012547 |
|    |         |       |             | $H \rightarrow L + 2$     | 0.871473 |
|    |         |       |             | $H \rightarrow L + 5$     | 0.057164 |
|    |         |       |             | $H - 1 \rightarrow L + 3$ | 0.023876 |
| 18 | 18225.6 | 548.7 | 0.000200790 | $H - 1 \rightarrow L + 1$ | 0.045612 |
|    |         |       |             | $H - 1 \rightarrow L + 3$ | 0.895951 |
|    |         |       |             | $H - 1 \rightarrow L + 5$ | 0.014838 |
| 19 | 18543.2 | 539.3 | 0.000021501 | $H - 1 \rightarrow L + 2$ | 0.063368 |
|    |         |       |             | $H \rightarrow L + 1$     | 0.023435 |
|    |         |       |             | $H \rightarrow L + 2$     | 0.873779 |
|    |         |       |             | $H \rightarrow L + 2$     | 0.024787 |
| 20 | 18841.9 | 530.7 | 0.002907557 | $H \rightarrow L + 4$     | 0.022496 |
|    |         |       |             | $H \rightarrow L + 5$     | 0.204172 |
|    |         |       |             | $H \rightarrow L + 7$     | 0.045070 |
|    |         |       |             | $H \rightarrow L + 4$     | 0.024846 |
|    |         |       |             | $H \rightarrow L + 5$     | 0.148243 |
|    |         |       |             | $H \rightarrow L + 7$     | 0.507117 |

Table S4. Frank-Condon (vertical)  $S_0-S_n$  ( $n = 1-20$ ) transitions of  $[\text{Li}(\text{H}^{\text{PL}})]_2$  (TD-PBE0/def2-TZVPD level; geometry was optimized at PBE0-D3BJ/def2-SVPD)

| State | Energy, cm <sup>-1</sup> | Wavelength, nm | Oscillator strength | Transitions                         | Contributions |
|-------|--------------------------|----------------|---------------------|-------------------------------------|---------------|
| 1     | 21083.5                  | 474.3          | 0.030773129         | $\text{H} \rightarrow \text{L}$     | 0.022681      |
|       |                          |                |                     | $\text{H} \rightarrow \text{L} + 1$ | 0.025985      |
|       |                          |                |                     | $\text{H} \rightarrow \text{L} + 1$ | 0.024421      |
|       |                          |                |                     | $\text{H} \rightarrow \text{L} + 1$ | 0.043930      |
|       |                          |                |                     | $\text{H} \rightarrow \text{L} + 1$ | 0.018343      |
|       |                          |                |                     | $\text{H} \rightarrow \text{L}$     | 0.039818      |
|       |                          |                |                     | $\text{H} \rightarrow \text{L} + 1$ | 0.156588      |
|       |                          |                |                     | $\text{H} \rightarrow \text{L} + 2$ | 0.093900      |
|       |                          |                |                     | $\text{H} \rightarrow \text{L}$     | 0.229205      |
|       |                          |                |                     | $\text{H} \rightarrow \text{L} + 1$ | 0.227898      |
|       |                          |                |                     | $\text{H} \rightarrow \text{L} + 2$ | 0.091275      |
|       |                          |                |                     |                                     |               |
| 2     | 21286.8                  | 469.8          | 0.031325643         | $\text{H} \rightarrow \text{L}$     | 0.024967      |
|       |                          |                |                     | $\text{H} \rightarrow \text{L} + 1$ | 0.042769      |
|       |                          |                |                     | $\text{H} \rightarrow \text{L} + 1$ | 0.686780      |
|       |                          |                |                     | $\text{H} \rightarrow \text{L} + 1$ | 0.012785      |
|       |                          |                |                     | $\text{H} \rightarrow \text{L}$     | 0.123102      |
|       |                          |                |                     | $\text{H} \rightarrow \text{L} + 1$ | 0.042934      |
|       |                          |                |                     | $\text{H} \rightarrow \text{L} + 2$ | 0.030600      |
| 3     | 21445.9                  | 466.3          | 0.057683514         | $\text{H} \rightarrow \text{L} + 2$ | 0.042149      |
|       |                          |                |                     | $\text{H} \rightarrow \text{L}$     | 0.027390      |
|       |                          |                |                     | $\text{H} \rightarrow \text{L}$     | 0.076149      |
|       |                          |                |                     | $\text{H} \rightarrow \text{L}$     | 0.048384      |
|       |                          |                |                     | $\text{H} \rightarrow \text{L} + 2$ | 0.011726      |
|       |                          |                |                     | $\text{H} \rightarrow \text{L} + 2$ | 0.060410      |
|       |                          |                |                     | $\text{H} \rightarrow \text{L}$     | 0.110645      |
|       |                          |                |                     | $\text{H} \rightarrow \text{L} + 1$ | 0.018059      |
|       |                          |                |                     | $\text{H} \rightarrow \text{L} + 2$ | 0.169538      |
|       |                          |                |                     | $\text{H} \rightarrow \text{L} + 2$ | 0.118443      |
|       |                          |                |                     | $\text{H} \rightarrow \text{L}$     | 0.163133      |
|       |                          |                |                     | $\text{H} \rightarrow \text{L} + 1$ | 0.015616      |
| 4     | 21494.3                  | 465.2          | 0.085704878         | $\text{H} \rightarrow \text{L} + 2$ | 0.122342      |
|       |                          |                |                     | $\text{H} \rightarrow \text{L} + 2$ | 0.038186      |
|       |                          |                |                     | $\text{H} \rightarrow \text{L}$     | 0.043881      |
|       |                          |                |                     | $\text{H} \rightarrow \text{L}$     | 0.226692      |
|       |                          |                |                     | $\text{H} \rightarrow \text{L}$     | 0.239218      |
|       |                          |                |                     | $\text{H} \rightarrow \text{L}$     | 0.012870      |
|       |                          |                |                     | $\text{H} \rightarrow \text{L} + 2$ | 0.016720      |
|       |                          |                |                     | $\text{H} \rightarrow \text{L} + 2$ | 0.018174      |
|       |                          |                |                     | $\text{H} \rightarrow \text{L}$     | 0.099503      |
|       |                          |                |                     | $\text{H} \rightarrow \text{L} + 1$ | 0.276916      |
|       |                          |                |                     |                                     |               |
|       |                          |                |                     |                                     |               |
| 5     | 21713.7                  | 460.5          | 0.003070963         | $\text{H} \rightarrow \text{L} + 1$ | 0.010481      |
|       |                          |                |                     | $\text{H} \rightarrow \text{L} + 2$ | 0.026379      |
|       |                          |                |                     | $\text{H} \rightarrow \text{L} + 2$ | 0.032432      |
|       |                          |                |                     | $\text{H} \rightarrow \text{L} + 2$ | 0.044472      |
|       |                          |                |                     | $\text{H} \rightarrow \text{L} + 2$ | 0.011559      |
|       |                          |                |                     | $\text{H} \rightarrow \text{L} + 2$ | 0.049401      |
|       |                          |                |                     | $\text{H} \rightarrow \text{L} + 1$ | 0.269930      |
|       |                          |                |                     | $\text{H} \rightarrow \text{L} + 2$ | 0.524016      |
| 6     | 22033.4                  | 453.9          | 0.065837967         | $\text{H} \rightarrow \text{L} + 2$ | 0.063834      |
|       |                          |                |                     | $\text{H} \rightarrow \text{L} + 2$ | 0.552637      |
|       |                          |                |                     | $\text{H} \rightarrow \text{L} + 2$ | 0.122672      |
|       |                          |                |                     | $\text{H} \rightarrow \text{L} + 1$ | 0.067490      |
|       |                          |                |                     | $\text{H} \rightarrow \text{L} + 2$ | 0.159615      |
| 7     | 22217.5                  | 450.1          | 0.003341159         | $\text{H} \rightarrow \text{L} + 2$ | 0.016661      |
|       |                          |                |                     | $\text{H} \rightarrow \text{L} + 2$ | 0.218861      |
|       |                          |                |                     | $\text{H} \rightarrow \text{L} + 2$ | 0.039496      |
|       |                          |                |                     | $\text{H} \rightarrow \text{L} + 2$ | 0.597845      |
|       |                          |                |                     | $\text{H} \rightarrow \text{L}$     | 0.070243      |
| 8     | 22487.6                  | 444.7          | 0.000035694         | $\text{H} \rightarrow \text{L} + 1$ | 0.029007      |
|       |                          |                |                     | $\text{H} \rightarrow \text{L} + 1$ | 0.010031      |
|       |                          |                |                     | $\text{H} \rightarrow \text{L} + 1$ | 0.036442      |
|       |                          |                |                     | $\text{H} \rightarrow \text{L}$     | 0.727782      |
|       |                          |                |                     | $\text{H} \rightarrow \text{L} + 1$ | 0.028887      |
|       |                          |                |                     | $\text{H} \rightarrow \text{L} + 2$ | 0.018912      |



|    |         |       |             |                       |             |
|----|---------|-------|-------------|-----------------------|-------------|
| 9  | 23077.7 | 433.3 | 0.004482217 | H $\rightarrow$ L + 2 | 0.010553    |
|    |         |       |             | H $\rightarrow$ L     | 0.151157    |
|    |         |       |             | H $\rightarrow$ L     | 0.044117    |
|    |         |       |             | H $\rightarrow$ L     | 0.452756    |
|    |         |       |             | H $\rightarrow$ L     | 0.365743    |
|    |         |       |             | H $\rightarrow$ L     | 0.030696    |
| 10 | 23562.8 | 424.4 | 0.004329880 | H $\rightarrow$ L     | 0.057507    |
|    |         |       |             | H $\rightarrow$ L     | 0.018447    |
|    |         |       |             | H $\rightarrow$ L     | 0.026924    |
|    |         |       |             | H $\rightarrow$ L     | 0.214540    |
|    |         |       |             | H $\rightarrow$ L     | 0.010027    |
|    |         |       |             | H $\rightarrow$ L     | 0.549384    |
| 11 | 24489.8 | 408.3 | 0.000309616 | H $\rightarrow$ L     | 0.040374    |
|    |         |       |             | H $\rightarrow$ L     | 0.132952    |
|    |         |       |             | H $\rightarrow$ L     | 0.012939    |
|    |         |       |             | H $\rightarrow$ L     | 0.026265    |
|    |         |       |             | H $\rightarrow$ L + 2 | 0.011029    |
|    |         |       |             | H $\rightarrow$ L     | 0.052201    |
| 12 | 24724.6 | 404.5 | 0.001001486 | H $\rightarrow$ L + 1 | 0.701037    |
|    |         |       |             | H $\rightarrow$ L + 2 | 0.104774    |
|    |         |       |             | H $\rightarrow$ L + 1 | 0.065635    |
|    |         |       |             | H $\rightarrow$ L + 1 | 0.794521    |
|    |         |       |             | H $\rightarrow$ L + 1 | 0.117699    |
|    |         |       |             | H $\rightarrow$ L     | 0.042475    |
| 13 | 24824.7 | 402.8 | 0.002204527 | H $\rightarrow$ L + 1 | 0.019704    |
|    |         |       |             | H $\rightarrow$ L     | 0.528649    |
|    |         |       |             | H $\rightarrow$ L     | 0.027572    |
|    |         |       |             | H $\rightarrow$ L     | 0.211760    |
|    |         |       |             | H $\rightarrow$ L + 1 | 0.107831    |
|    |         |       |             | H $\rightarrow$ L + 2 | 0.065891    |
| 14 | 24908.8 | 401.5 | 0.000128782 | H $\rightarrow$ L     | 0.092351    |
|    |         |       |             | H $\rightarrow$ L + 1 | 0.100380    |
|    |         |       |             | H $\rightarrow$ L + 2 | 0.017018    |
|    |         |       |             | H $\rightarrow$ L     | 0.041764    |
|    |         |       |             | H $\rightarrow$ L + 1 | 0.028260    |
|    |         |       |             | H $\rightarrow$ L + 2 | 0.631424    |
| 15 | 25522.8 | 391.8 | 0.006278843 | H $\rightarrow$ L + 2 | 0.054745    |
|    |         |       |             | H $\rightarrow$ L + 1 | 0.793026    |
|    |         |       |             | H $\rightarrow$ L + 2 | 0.066671    |
|    |         |       |             | H $\rightarrow$ L + 2 | 0.065459    |
|    |         |       |             | H $\rightarrow$ L + 1 | 0.035385    |
|    |         |       |             | H $\rightarrow$ L + 1 | 0.040574    |
| 16 | 25818.6 | 387.3 | 0.000076609 | H $\rightarrow$ L + 2 | 0.840448    |
|    |         |       |             | H $\rightarrow$ L + 1 | 0.029517    |
|    |         |       |             | H $\rightarrow$ L + 2 | 0.039288    |
|    |         |       |             | H $\rightarrow$ L + 2 | 0.037576    |
|    |         |       |             | H $\rightarrow$ L + 3 | 0.014223    |
|    |         |       |             | H $\rightarrow$ L + 3 | 0.171428    |
| 17 | 29883.7 | 334.6 | 0.000740007 | H $\rightarrow$ L + 3 | 0.758512    |
|    |         |       |             | H $\rightarrow$ L + 4 | 0.027502    |
|    |         |       |             | H $\rightarrow$ L + 3 | 0.016820    |
|    |         |       |             | H $\rightarrow$ L + 4 | 0.027864    |
|    |         |       |             | H $\rightarrow$ L + 3 | 0.124763    |
|    |         |       |             | H $\rightarrow$ L + 4 | 0.623507    |
| 18 | 30533.6 | 327.5 | 0.018248756 | H $\rightarrow$ L + 3 | 0.028904    |
|    |         |       |             | H $\rightarrow$ L + 3 | 0.149244    |
|    |         |       |             | H $\rightarrow$ L + 4 | 0.013405933 |
|    |         |       |             | H $\rightarrow$ L + 3 | 0.565301    |
|    |         |       |             | H $\rightarrow$ L + 3 | 0.165951    |
|    |         |       |             | H $\rightarrow$ L + 4 | 0.020210    |
| 19 | 31401.3 | 318.5 | 0.013405933 | H $\rightarrow$ L + 3 | 0.048549    |
|    |         |       |             | H $\rightarrow$ L + 4 | 0.181587    |
|    |         |       |             | H $\rightarrow$ L + 4 | 0.021587    |
|    |         |       |             | H $\rightarrow$ L + 3 | 0.030369    |
|    |         |       |             | H $\rightarrow$ L + 4 | 0.207387    |
|    |         |       |             | H $\rightarrow$ L + 3 | 0.023545    |
| 20 | 31481.4 | 317.6 | 0.004412492 | H $\rightarrow$ L + 4 | 0.169687    |
|    |         |       |             | H $\rightarrow$ L + 4 | 0.074259    |
|    |         |       |             | H $\rightarrow$ L + 3 | 0.466540    |
|    |         |       |             | H $\rightarrow$ L + 4 |             |
|    |         |       |             | H $\rightarrow$ L + 4 |             |
|    |         |       |             | H $\rightarrow$ L + 4 |             |

Table S5. Frank-Condon (vertical)  $S_0-S_n$  ( $n = 1-20$ ) transitions of  $[\text{Li}(\text{H}^{\text{NL}})(\text{thf})_2]$  (TD-PBE0/def2-TZVPD level; geometry was optimized at PBE0-D3BJ/def2-SVPD)

| State | Energy, cm <sup>-1</sup> | Wavelength, nm | Oscillator strength | Transitions               | Contributions |
|-------|--------------------------|----------------|---------------------|---------------------------|---------------|
| 1     | 17559.4                  | 569.5          | 0.084958137         | H $\rightarrow$ L         | 0.069454      |
|       |                          |                |                     | H $\rightarrow$ L + 1     | 0.914984      |
| 2     | 18408.1                  | 543.2          | 0.004022390         | H - 1 $\rightarrow$ L     | 0.011584      |
|       |                          |                |                     | H $\rightarrow$ L         | 0.918922      |
|       |                          |                |                     | H $\rightarrow$ L + 1     | 0.066421      |
| 3     | 21033.5                  | 475.4          | 0.088083944         | H - 2 $\rightarrow$ L     | 0.011969      |
|       |                          |                |                     | H - 1 $\rightarrow$ L     | 0.958975      |
| 4     | 22977.2                  | 435.2          | 0.000672731         | H - 2 $\rightarrow$ L + 1 | 0.056324      |
|       |                          |                |                     | H - 1 $\rightarrow$ L + 1 | 0.928511      |
| 5     | 26488.5                  | 377.5          | 0.002904644         | H - 2 $\rightarrow$ L     | 0.971147      |
|       |                          |                |                     | H - 1 $\rightarrow$ L     | 0.012185      |
| 6     | 28135.4                  | 355.4          | 0.001331102         | H - 2 $\rightarrow$ L + 1 | 0.918142      |
|       |                          |                |                     | H - 1 $\rightarrow$ L + 1 | 0.059644      |
| 7     | 29215.8                  | 342.3          | 0.002369214         | H - 1 $\rightarrow$ L + 2 | 0.016174      |
|       |                          |                |                     | H $\rightarrow$ L + 2     | 0.963139      |
| 8     | 31186.2                  | 320.7          | 0.001786021         | H - 1 $\rightarrow$ L + 3 | 0.025770      |
|       |                          |                |                     | H $\rightarrow$ L + 3     | 0.953882      |
| 9     | 32657.0                  | 306.2          | 0.001509184         | H $\rightarrow$ L + 4     | 0.777959      |
|       |                          |                |                     | H $\rightarrow$ L + 5     | 0.106117      |
|       |                          |                |                     | H $\rightarrow$ L + 6     | 0.020777      |
|       |                          |                |                     | H $\rightarrow$ L + 7     | 0.028210      |
|       |                          |                |                     | H $\rightarrow$ L + 9     | 0.028811      |
|       |                          |                |                     | H $\rightarrow$ L + 10    | 0.010768      |
| 10    | 33772.4                  | 296.1          | 0.042114531         | H - 1 $\rightarrow$ L + 2 | 0.951557      |
|       |                          |                |                     | H $\rightarrow$ L + 2     | 0.017738      |
| 11    | 34885.7                  | 286.7          | 0.011577244         | H - 3 $\rightarrow$ L     | 0.014302      |
|       |                          |                |                     | H - 3 $\rightarrow$ L + 1 | 0.254314      |
|       |                          |                |                     | H - 1 $\rightarrow$ L + 3 | 0.047114      |
|       |                          |                |                     | H $\rightarrow$ L + 4     | 0.027101      |
|       |                          |                |                     | H $\rightarrow$ L + 5     | 0.084337      |
|       |                          |                |                     | H $\rightarrow$ L + 6     | 0.015499      |
|       |                          |                |                     | H $\rightarrow$ L + 7     | 0.127628      |
|       |                          |                |                     | H $\rightarrow$ L + 10    | 0.021329      |
|       |                          |                |                     | H $\rightarrow$ L + 11    | 0.261699      |
|       |                          |                |                     | H $\rightarrow$ L + 13    | 0.102503      |
| 12    | 34930.4                  | 286.3          | 0.004731419         | H - 3 $\rightarrow$ L + 1 | 0.063411      |
|       |                          |                |                     | H $\rightarrow$ L + 4     | 0.092204      |
|       |                          |                |                     | H $\rightarrow$ L + 5     | 0.110396      |
|       |                          |                |                     | H $\rightarrow$ L + 6     | 0.104243      |
|       |                          |                |                     | H $\rightarrow$ L + 7     | 0.275315      |
|       |                          |                |                     | H $\rightarrow$ L + 8     | 0.221513      |
|       |                          |                |                     | H $\rightarrow$ L + 10    | 0.014525      |
|       |                          |                |                     | H $\rightarrow$ L + 11    | 0.035083      |
|       |                          |                |                     | H $\rightarrow$ L + 13    | 0.028961      |
| 13    | 35329.6                  | 283.0          | 0.029141603         | H - 3 $\rightarrow$ L + 1 | 0.020133      |
|       |                          |                |                     | H - 1 $\rightarrow$ L + 3 | 0.844963      |
|       |                          |                |                     | H $\rightarrow$ L + 3     | 0.026002      |
|       |                          |                |                     | H $\rightarrow$ L + 5     | 0.013676      |
|       |                          |                |                     | H $\rightarrow$ L + 11    | 0.010242      |
| 14    | 35667.0                  | 280.4          | 0.001639452         | H - 3 $\rightarrow$ L + 1 | 0.024797      |
|       |                          |                |                     | H - 1 $\rightarrow$ L + 3 | 0.011467      |
|       |                          |                |                     | H $\rightarrow$ L + 4     | 0.067410      |
|       |                          |                |                     | H $\rightarrow$ L + 5     | 0.475726      |
|       |                          |                |                     | H $\rightarrow$ L + 7     | 0.089103      |
|       |                          |                |                     | H $\rightarrow$ L + 8     | 0.123380      |
|       |                          |                |                     | H $\rightarrow$ L + 9     | 0.066813      |
|       |                          |                |                     | H $\rightarrow$ L + 10    | 0.039074      |
|       |                          |                |                     | H $\rightarrow$ L + 12    | 0.026859      |
|       |                          |                |                     | H $\rightarrow$ L + 14    | 0.013069      |
|       |                          |                |                     | H $\rightarrow$ L + 15    | 0.016860      |
| 15    | 36279.1                  | 275.6          | 0.053588994         | H - 6 $\rightarrow$ L     | 0.225627      |
|       |                          |                |                     | H - 5 $\rightarrow$ L     | 0.184655      |
|       |                          |                |                     | H - 4 $\rightarrow$ L     | 0.176234      |
|       |                          |                |                     | H - 3 $\rightarrow$ L + 1 | 0.014082      |

|               |          |       |             |                |          |
|---------------|----------|-------|-------------|----------------|----------|
| 16            | 36396.6  | 274.8 | 0.043785282 | H - 2 → L + 10 | 0.016712 |
|               |          |       |             | H - 1 → L + 3  | 0.010156 |
|               |          |       |             | H - 1 → L + 9  | 0.039020 |
|               |          |       |             | H - 1 → L + 10 | 0.142046 |
|               |          |       |             | H → L + 6      | 0.095199 |
|               |          |       |             | H → L + 7      | 0.017313 |
|               |          |       |             | H - 6 → L      | 0.028974 |
|               |          |       |             | H - 5 → L      | 0.049203 |
|               |          |       |             | H - 4 → L      | 0.027303 |
|               |          |       |             | H - 3 → L      | 0.019616 |
|               |          |       |             | H - 3 → L + 1  | 0.048869 |
|               |          |       |             | H - 1 → L + 10 | 0.016171 |
|               |          |       |             | H → L + 5      | 0.015848 |
|               |          |       |             | H → L + 6      | 0.616843 |
|               |          |       |             | H → L + 7      | 0.070518 |
| 17            | 36970.5  | 270.5 | 0.001065059 | H → L + 13     | 0.032202 |
|               |          |       |             | H - 5 → L      | 0.072172 |
|               |          |       |             | H - 4 → L      | 0.034076 |
|               |          |       |             | H - 3 → L      | 0.717392 |
|               |          |       |             | H → L + 5      | 0.029251 |
|               |          |       |             | H → L + 6      | 0.015296 |
|               |          |       |             | H → L + 9      | 0.022026 |
|               |          |       |             | H → L + 10     | 0.053321 |
|               |          |       |             | H → L + 11     | 0.012516 |
|               |          |       |             | 18             | 37090.1  |
| H - 3 → L     | 0.089700 |       |             |                |          |
| H - 3 → L + 1 | 0.024181 |       |             |                |          |
| H - 1 → L + 5 | 0.019788 |       |             |                |          |
| H → L + 4     | 0.012581 |       |             |                |          |
| H → L + 5     | 0.115545 |       |             |                |          |
| H → L + 7     | 0.060653 |       |             |                |          |
| H → L + 8     | 0.010336 |       |             |                |          |
| H → L + 9     | 0.347430 |       |             |                |          |
| H → L + 10    | 0.181526 |       |             |                |          |
| H → L + 12    | 0.061844 |       |             |                |          |
| H → L + 14    | 0.013170 |       |             |                |          |
| H → L + 15    | 0.010016 |       |             |                |          |
| 19            | 37307.4  | 268.0 | 0.001095629 |                |          |
|               |          |       |             | H - 5 → L      | 0.034942 |
|               |          |       |             | H - 4 → L      | 0.692565 |
|               |          |       |             | H - 4 → L + 1  | 0.010065 |
|               |          |       |             | H - 3 → L      | 0.049010 |
| 20            | 37363.7  | 267.6 | 0.002666824 | H - 1 → L + 10 | 0.010459 |
|               |          |       |             | H - 2 → L + 5  | 0.019229 |
|               |          |       |             | H - 1 → L + 4  | 0.604129 |
|               |          |       |             | H - 1 → L + 5  | 0.267175 |
|               |          |       |             | H - 1 → L + 9  | 0.023392 |
|               |          |       |             | H → L + 5      | 0.024868 |
|               |          |       |             | H → L + 10     | 0.010486 |

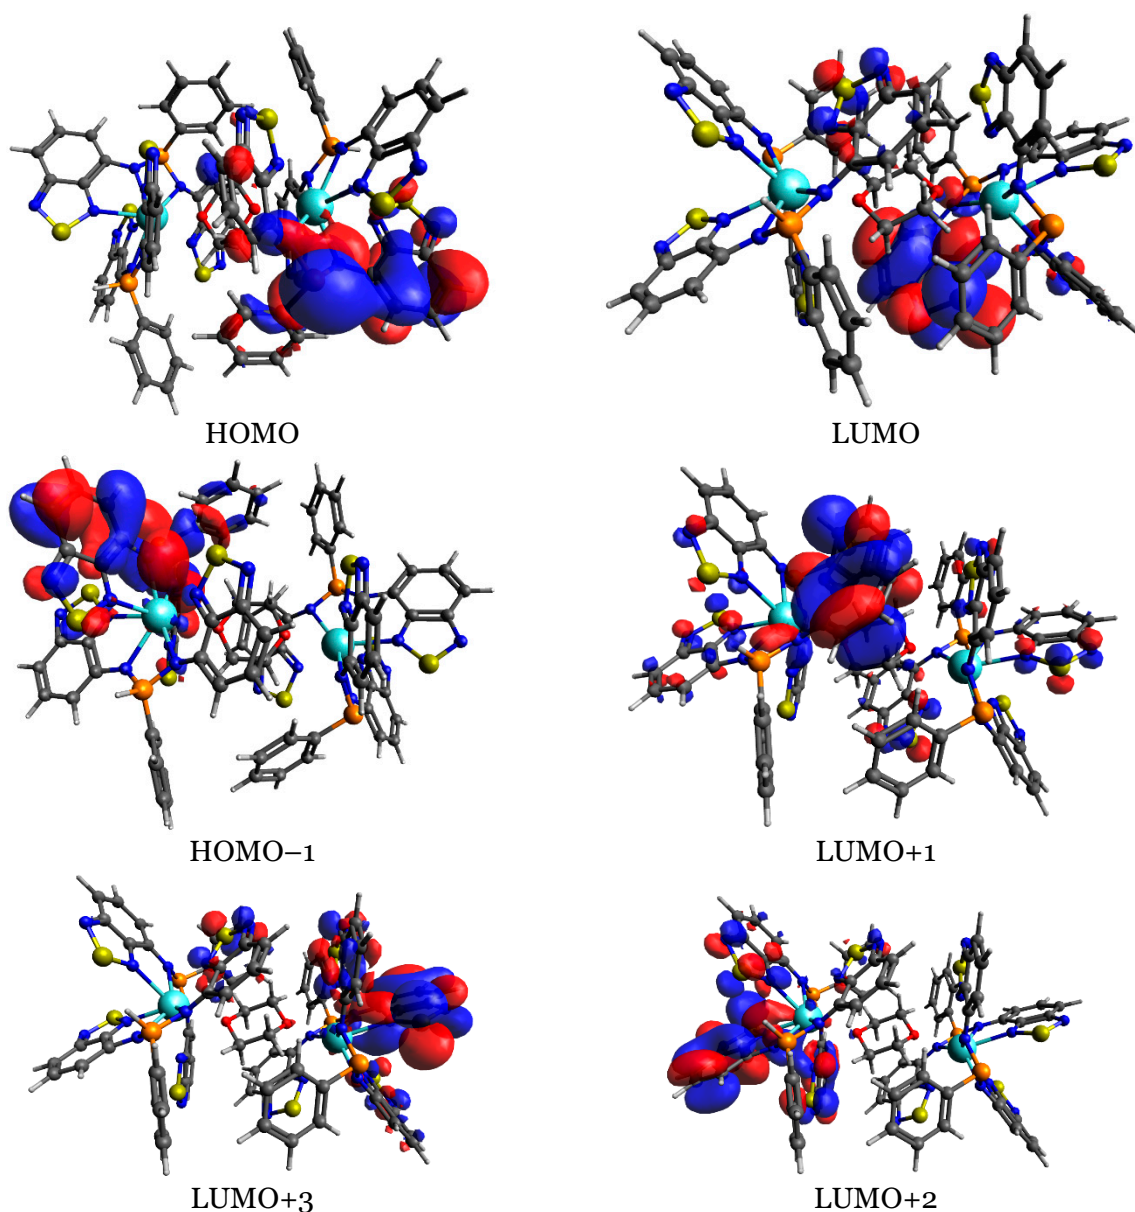

Figure S3. Frontier molecular orbitals for the complexes  $[\{Y(HL)L\}_2(\text{dioxane})]$  at TD-PBEo/def2-TZVPD level (isovalue = 0.03). HOMO is localized at P and one of N-Btd units of the  $L^{2-}$  ligand, LUMO – at one of N-Btd units of the  $LH^-$  ligand bound to the same Y. HOMO-1 is centrosymmetric with HOMO, LUMO-1 is centrosymmetric with LUMO. LUMO+2 and LUMO+3 are centrosymmetric with each other and are located on N-Btds of the  $LH^-$  ligands.

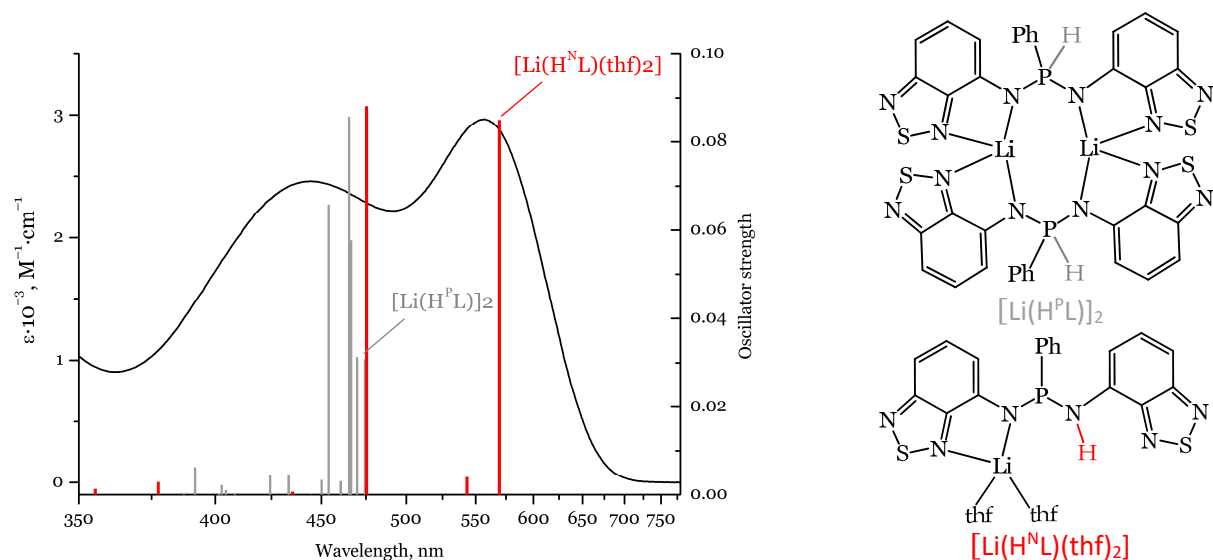

Figure S4. Comparison of the computed electronic transitions for the models  $[\text{Li}(\text{H}^{\text{P}}\text{L})]_2$  (gray bars) and  $[\text{Li}(\text{H}^{\text{N}}\text{L})(\text{thf})_2]$  (red bars) with different positions of the proton. The data for  $[\text{Li}(\text{H}^{\text{N}}\text{L})(\text{thf})_2]$  give a better agreement with the experimental spectrum of solution **2** in thf (black curve).

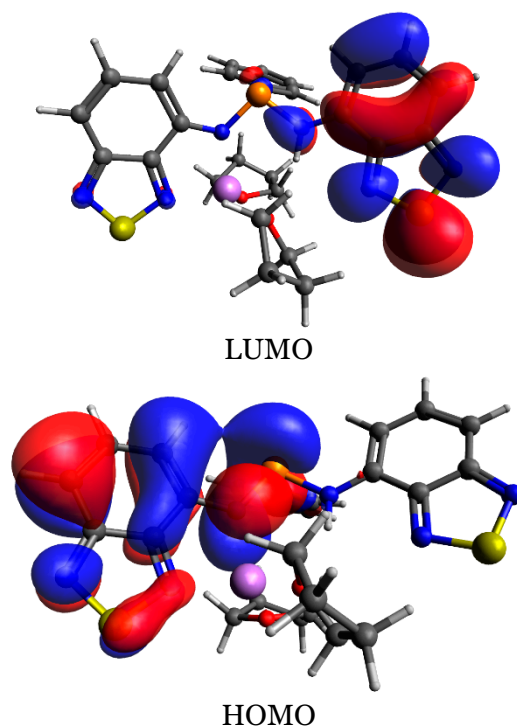

Figure S5. Frontier molecular orbitals for  $[\text{Li}(\text{H}^{\text{N}}\text{L})(\text{thf})_2]$  at TD-PBE0/def2-TZVPD level (isovalue = 0.03).

Table S6. Crystal data and structure refinement for the compounds.

| Identification code                         | <b>2</b> <sub>2</sub> ·Et <sub>2</sub> O                                                                      | <b>5</b> <sub>2</sub> (dioxane)-dioxane                                                                     | <b>4</b> <sub>2</sub> ·Et <sub>2</sub> O                                                                                       | <b>6</b> ·hexane                                                                                                 | <b>6</b> ·1.5thf                                                                                                |
|---------------------------------------------|---------------------------------------------------------------------------------------------------------------|-------------------------------------------------------------------------------------------------------------|--------------------------------------------------------------------------------------------------------------------------------|------------------------------------------------------------------------------------------------------------------|-----------------------------------------------------------------------------------------------------------------|
| Empirical formula                           | C <sub>40</sub> H <sub>34</sub> Li <sub>2</sub> N <sub>12</sub> O <sub>12</sub> P <sub>2</sub> S <sub>4</sub> | C <sub>80</sub> H <sub>62</sub> N <sub>24</sub> O <sub>4</sub> P <sub>4</sub> S <sub>8</sub> Y <sub>2</sub> | C <sub>52</sub> H <sub>66</sub> N <sub>14</sub> O <sub>1.35</sub> P <sub>2</sub> S <sub>4</sub> Si <sub>4</sub> Y <sub>2</sub> | C <sub>58</sub> H <sub>68</sub> LiN <sub>12</sub> O <sub>4.44</sub> P <sub>2</sub> S <sub>4</sub> Y <sub>2</sub> | C <sub>58</sub> H <sub>66</sub> LiN <sub>12</sub> O <sub>5.5</sub> P <sub>2</sub> S <sub>4</sub> Y <sub>2</sub> |
| Formula weight                              | 902.85                                                                                                        | 1981.71                                                                                                     | 1389.06                                                                                                                        | 1290.27                                                                                                          | 1305.25                                                                                                         |
| Temperature/K                               | 150(2)                                                                                                        | 150(2)                                                                                                      | 150(2)                                                                                                                         | 120(2)                                                                                                           | 150(2)                                                                                                          |
| Space group                                 | C2/c                                                                                                          | P-1                                                                                                         | P-1                                                                                                                            | C222 <sub>1</sub>                                                                                                | C2                                                                                                              |
| a/Å                                         | 16.2210(16)                                                                                                   | 12.7016(5)                                                                                                  | 11.3563(15)                                                                                                                    | 17.1047(13)                                                                                                      | 20.4710(6)                                                                                                      |
| b/Å                                         | 16.2345(16)                                                                                                   | 13.4532(6)                                                                                                  | 14.0602(17)                                                                                                                    | 21.2579(18)                                                                                                      | 17.6930(4)                                                                                                      |
| c/Å                                         | 16.4504(17)                                                                                                   | 15.2339(6)                                                                                                  | 20.387(3)                                                                                                                      | 17.3786(11)                                                                                                      | 17.2725(5)                                                                                                      |
| α/°                                         | 90                                                                                                            | 95.2940(10)                                                                                                 | 86.742(4)                                                                                                                      | 90                                                                                                               | 90                                                                                                              |
| β/°                                         | 106.737(3)                                                                                                    | 110.9220(10)                                                                                                | 77.207(4)                                                                                                                      | 90                                                                                                               | 97.1100(10)                                                                                                     |
| γ/°                                         | 90                                                                                                            | 117.9530(10)                                                                                                | 89.549(4)                                                                                                                      | 90                                                                                                               | 90                                                                                                              |
| Volume/Å <sup>3</sup>                       | 4148.5(7)                                                                                                     | 2038.69(15)                                                                                                 | 3169.2(7)                                                                                                                      | 6319.0(8)                                                                                                        | 6207.9(3)                                                                                                       |
| Z                                           | 4                                                                                                             | 1                                                                                                           | 2                                                                                                                              | 4                                                                                                                | 4                                                                                                               |
| ρ <sub>calc</sub> /g/cm <sup>3</sup>        | 1.446                                                                                                         | 1.614                                                                                                       | 1.456                                                                                                                          | 1.356                                                                                                            | 1.397                                                                                                           |
| μ/mm <sup>-1</sup>                          | 0.357                                                                                                         | 1.769                                                                                                       | 2.130                                                                                                                          | 1.161                                                                                                            | 1.184                                                                                                           |
| F(000)                                      | 1864.0                                                                                                        | 1008.0                                                                                                      | 1430.0                                                                                                                         | 2686.0                                                                                                           | 2712.0                                                                                                          |
| Crystal size/mm <sup>3</sup>                | 0.08 × 0.06 × 0.06                                                                                            | 0.15 × 0.06 × 0.04                                                                                          | 0.2 × 0.12 × 0.08                                                                                                              | 0.23 × 0.15 × 0.06                                                                                               | 0.2 × 0.15 × 0.15                                                                                               |
| Radiation                                   | MoKα (λ = 0.71073)                                                                                            | MoKα (λ = 0.71073)                                                                                          | MoKα (λ = 0.71073)                                                                                                             | MoKα (λ = 0.71073)                                                                                               | MoKα (λ = 0.71073)                                                                                              |
| 2θ range for data collection/°              | 4.874 to 48.83                                                                                                | 5.218 to 52.836                                                                                             | 2.902 to 48.814                                                                                                                | 4.492 to 48.81                                                                                                   | 4.908 to 51.364                                                                                                 |
| Index ranges                                | -18 ≤ h ≤ 18, -18 ≤ k ≤ 18, -19 ≤ l ≤ 15                                                                      | -15 ≤ h ≤ 15, -16 ≤ k ≤ 16, -19 ≤ l ≤ 19                                                                    | -13 ≤ h ≤ 13, -16 ≤ k ≤ 16, -23 ≤ l ≤ 23                                                                                       | -19 ≤ h ≤ 17, -24 ≤ k ≤ 24, -19 ≤ l ≤ 20                                                                         | -24 ≤ h ≤ 24, 0 ≤ k ≤ 21, 0 ≤ l ≤ 21                                                                            |
| Reflections collected                       | 9525                                                                                                          | 33857                                                                                                       | 30088                                                                                                                          | 28004                                                                                                            | 6021                                                                                                            |
| Independent reflections                     | 3409 [R <sub>int</sub> = 0.0620, R <sub>sigma</sub> = 0.0763]                                                 | 8331 [R <sub>int</sub> = 0.0455, R <sub>sigma</sub> = 0.0446]                                               | 10375 [R <sub>int</sub> = 0.0541, R <sub>sigma</sub> = 0.0755]                                                                 | 5203 [R <sub>int</sub> = 0.0615, R <sub>sigma</sub> = 0.0541]                                                    | 6021 [R <sub>int</sub> = 0.0811, R <sub>sigma</sub> = 0.0624]                                                   |
| Data/restraints/parameters                  | 3409/0/280                                                                                                    | 8331/0/553                                                                                                  | 10375/38/742                                                                                                                   | 5203/59/384                                                                                                      | 6021/53/726                                                                                                     |
| Goodness-of-fit on F <sup>2</sup>           | 1.023                                                                                                         | 1.013                                                                                                       | 1.032                                                                                                                          | 1.024                                                                                                            | 1.079                                                                                                           |
| Final R indexes [I > 2σ(I)]                 | R <sub>1</sub> = 0.0587, wR <sub>2</sub> = 0.1445                                                             | R <sub>1</sub> = 0.0355, wR <sub>2</sub> = 0.0774                                                           | R <sub>1</sub> = 0.0443, wR <sub>2</sub> = 0.0859                                                                              | R <sub>1</sub> = 0.0347, wR <sub>2</sub> = 0.0843                                                                | R <sub>1</sub> = 0.0491, wR <sub>2</sub> = 0.1225                                                               |
| Final R indexes [all data]                  | R <sub>1</sub> = 0.1038, wR <sub>2</sub> = 0.1683                                                             | R <sub>1</sub> = 0.0549, wR <sub>2</sub> = 0.0842                                                           | R <sub>1</sub> = 0.0815, wR <sub>2</sub> = 0.0965                                                                              | R <sub>1</sub> = 0.0422, wR <sub>2</sub> = 0.0878                                                                | R <sub>1</sub> = 0.0606, wR <sub>2</sub> = 0.1278                                                               |
| Largest diff. peak/hole / e Å <sup>-3</sup> | 0.68/-0.40                                                                                                    | 0.34/-0.56                                                                                                  | 0.67/-0.44                                                                                                                     | 0.48/-0.26                                                                                                       | 0.67/-0.45                                                                                                      |
| Flack parameter                             |                                                                                                               |                                                                                                             |                                                                                                                                | 0.166(7)                                                                                                         | 0.448(14)                                                                                                       |

## $^1\text{H}$ and $^{31}\text{P}$ NMR spectra of the compounds

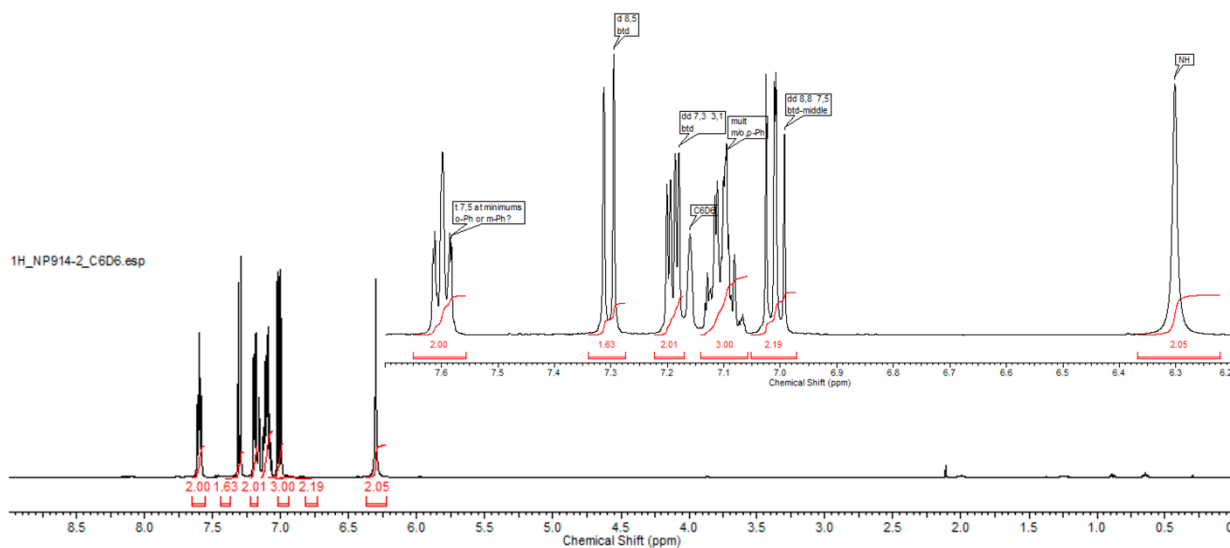

Figure S6.  $^1\text{H}$  NMR spectrum of  $\text{H}_2\text{L}$ , solution in  $\text{C}_6\text{D}_6$ . The inset shows low-field part of the spectrum.

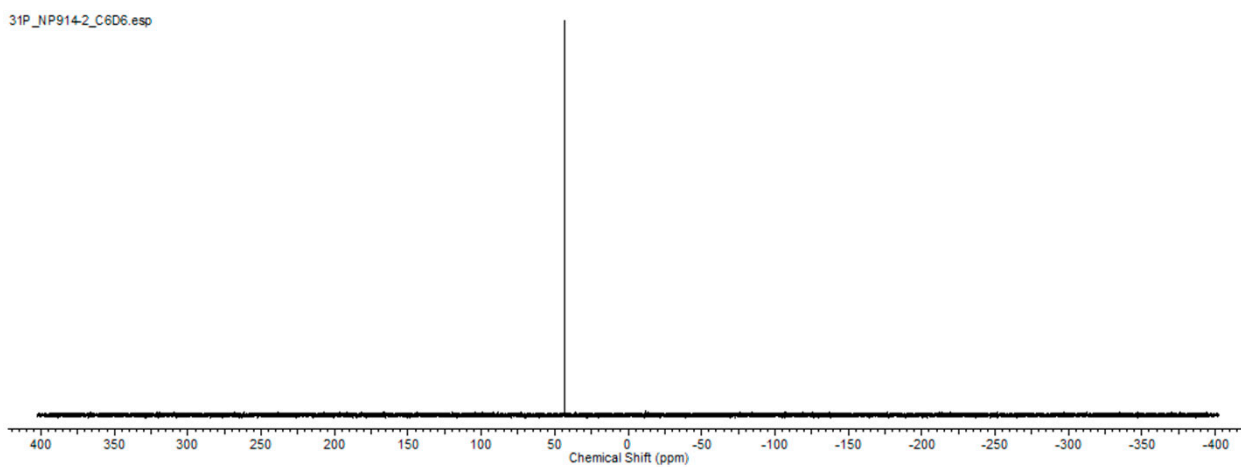

Figure S7.  $^{31}\text{P}$  NMR spectrum of  $\text{H}_2\text{L}$ , solution in  $\text{C}_6\text{D}_6$ .

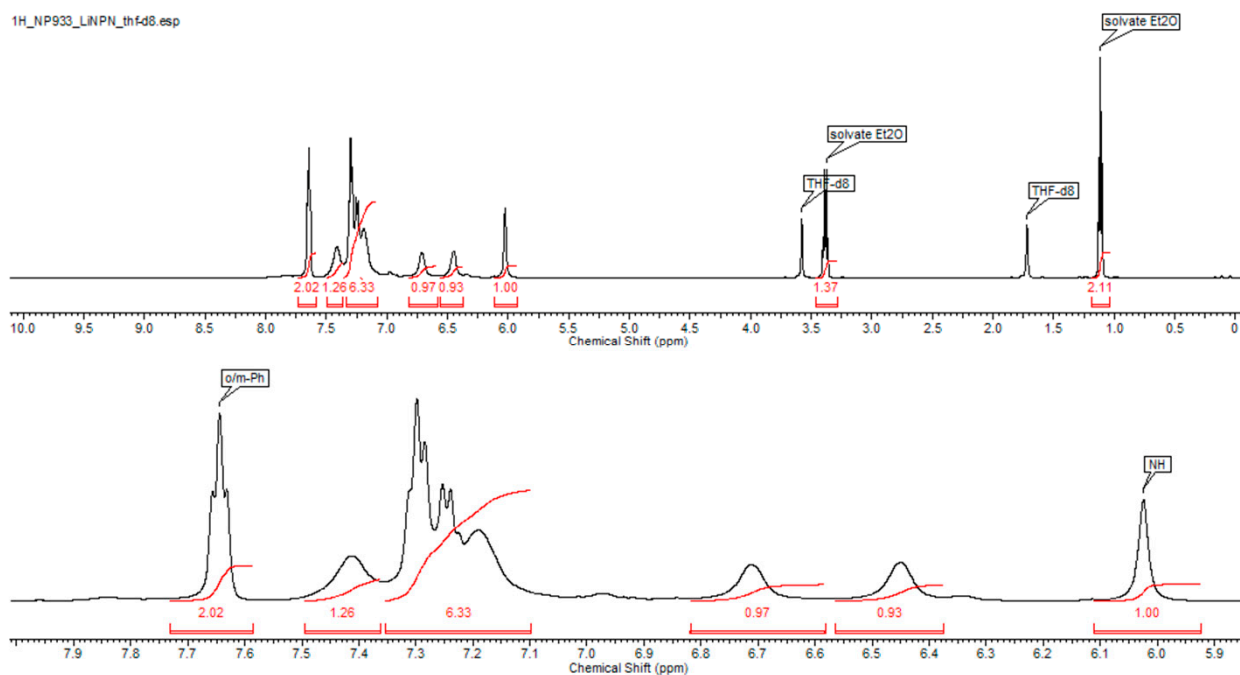

Figure S8. (top)  $^1\text{H}$  NMR spectrum of  $[\text{Li}(\text{HL})]_2$  (**2**<sub>2</sub>), solution in thf-d8; (bottom) low-field part of the spectrum.

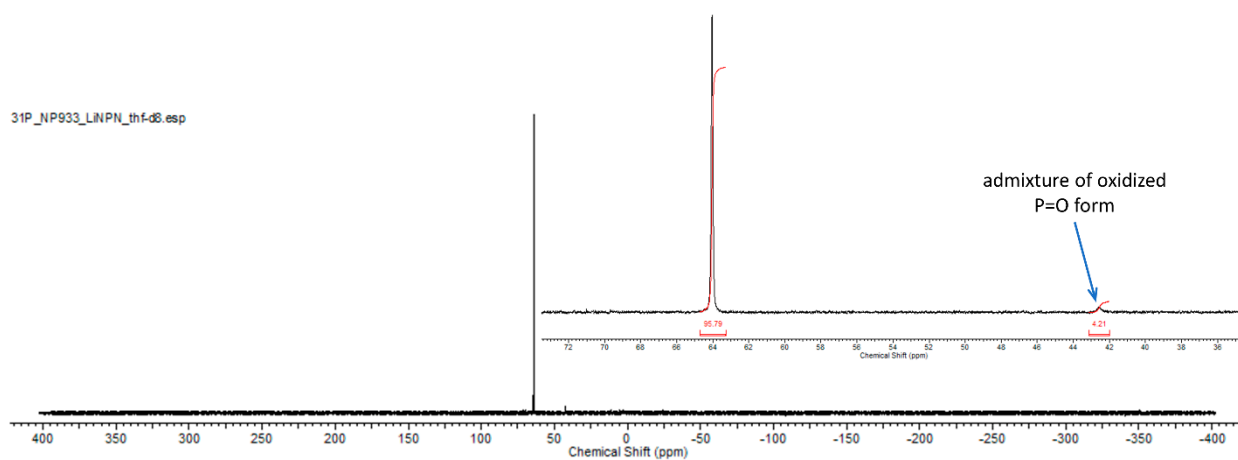

Figure S9.  $^{31}\text{P}$  NMR spectrum of  $[\text{Li}(\text{HL})]_2$  (**2**<sub>2</sub>), solution in thf-d8; the inset shows enlarged central part of the spectrum.



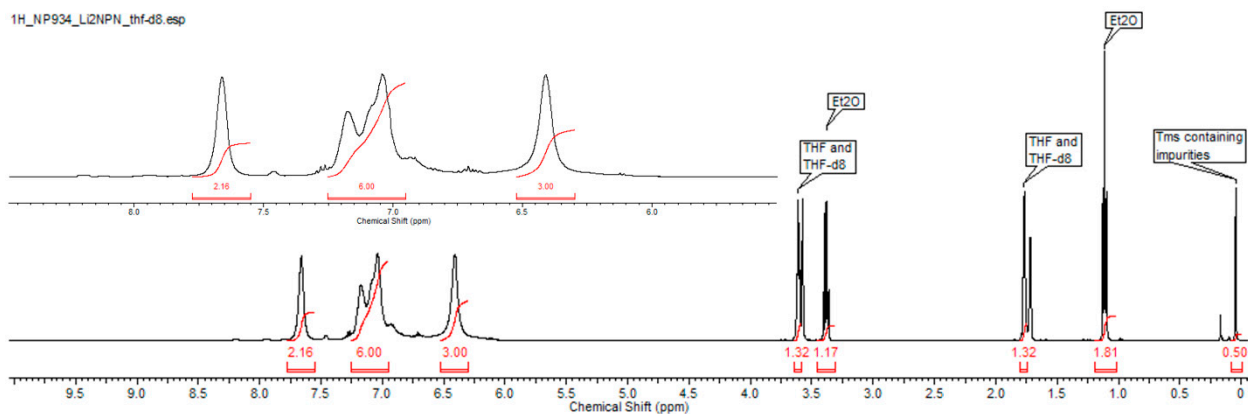

Figure S10.  $^1\text{H}$  NMR spectrum of  $\text{Li}_2\text{L}$  (**3**), solution in thf-d8; the inset shows enlarged low-field part of the spectrum.

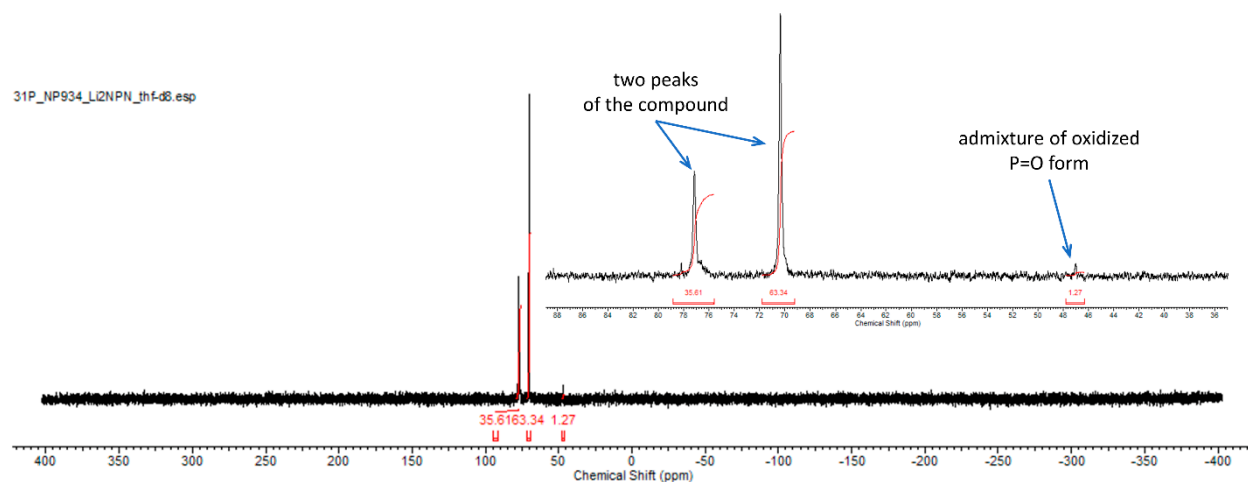

Figure S11.  $^{31}\text{P}$  NMR spectrum of  $\text{Li}_2\text{L}$  (**3**), solution in thf-d8; the inset shows enlarged central part of the spectrum.

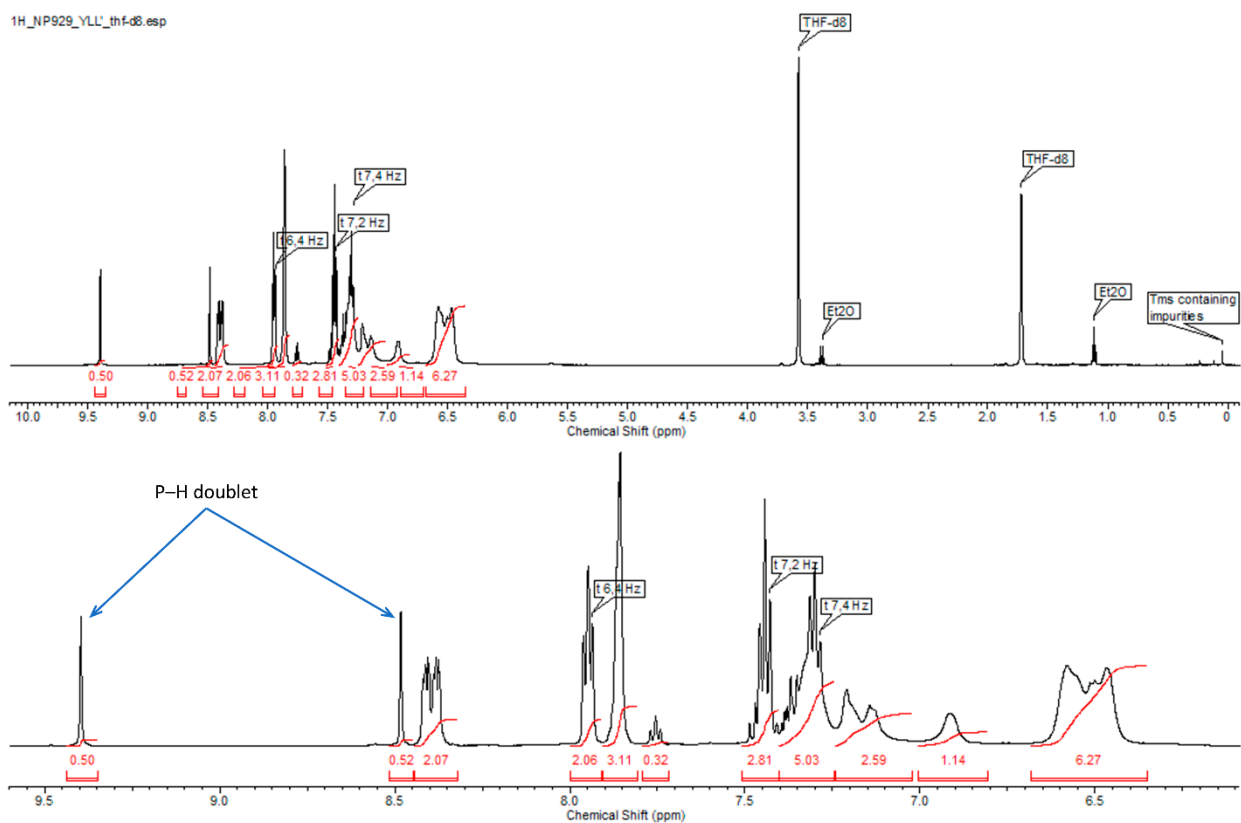

Figure S12. (top)  $^1\text{H}$  NMR spectrum of  $[\text{Y}(\text{L})(\text{HL})]$  (**5**), solution in thf-d8; (bottom) enlarged low-field part of the spectrum.

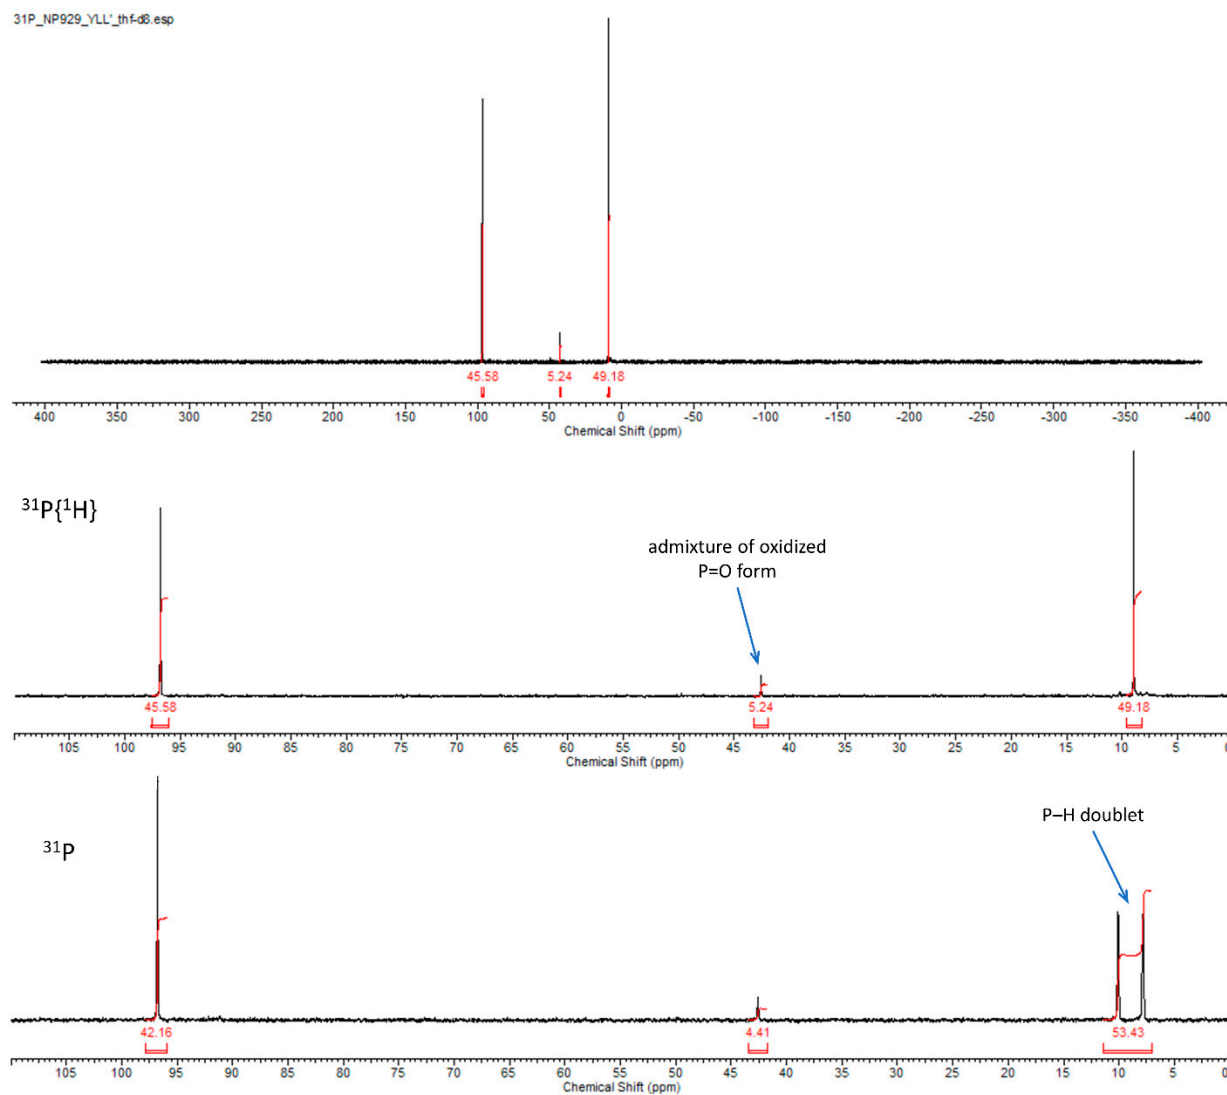

Figure S13. (top)  $^{31}\text{P}\{^1\text{H}\}$  NMR spectrum of  $[\text{Y}(\text{L})(\text{HL})]$  (**5**), solution in thf-d<sub>8</sub>; (bottom) comparison of peaks in  $^{31}\text{P}$  and  $^{31}\text{P}\{^1\text{H}\}$  spectra.

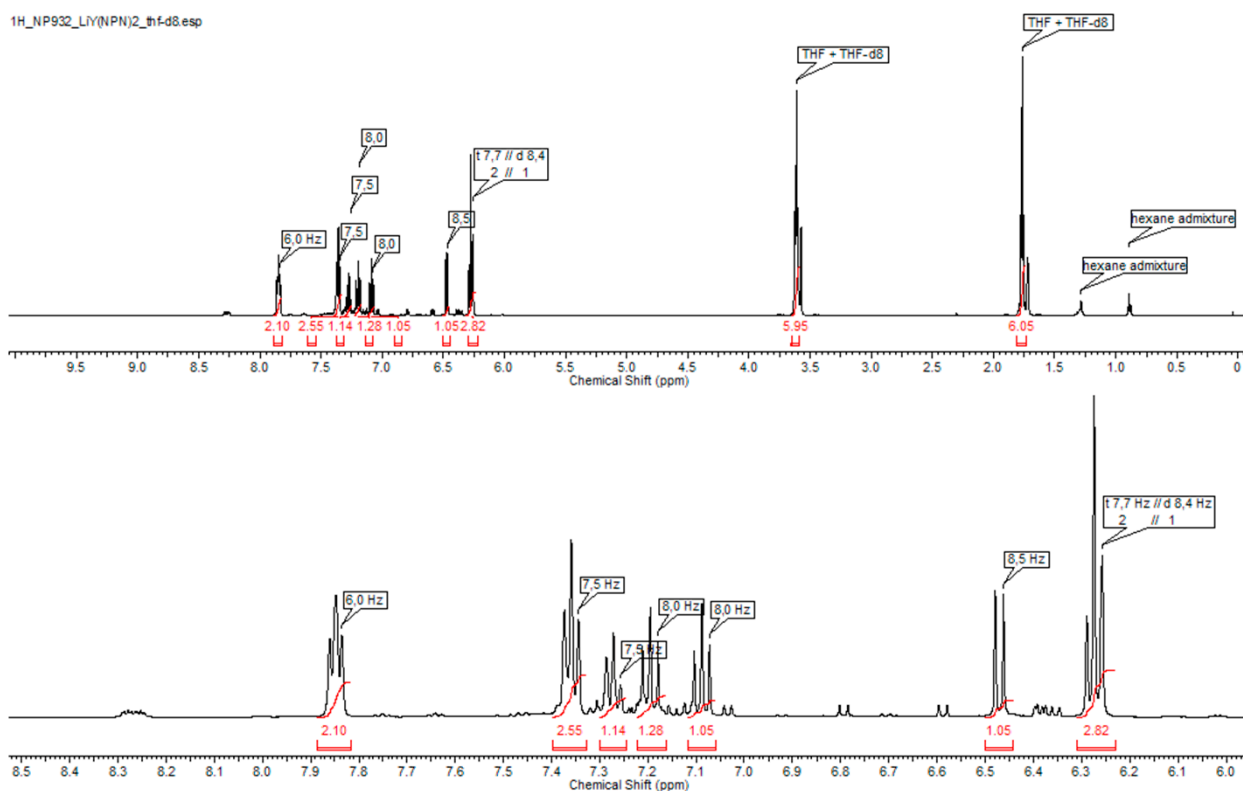

Figure S14. (top)  $^1\text{H}$  NMR spectrum of  $[\text{Li}(\text{thf})_4][\text{YL}_2]$  (**6**), solution in thf-d8; (bottom) enlarged view of the low-field part of the spectrum.

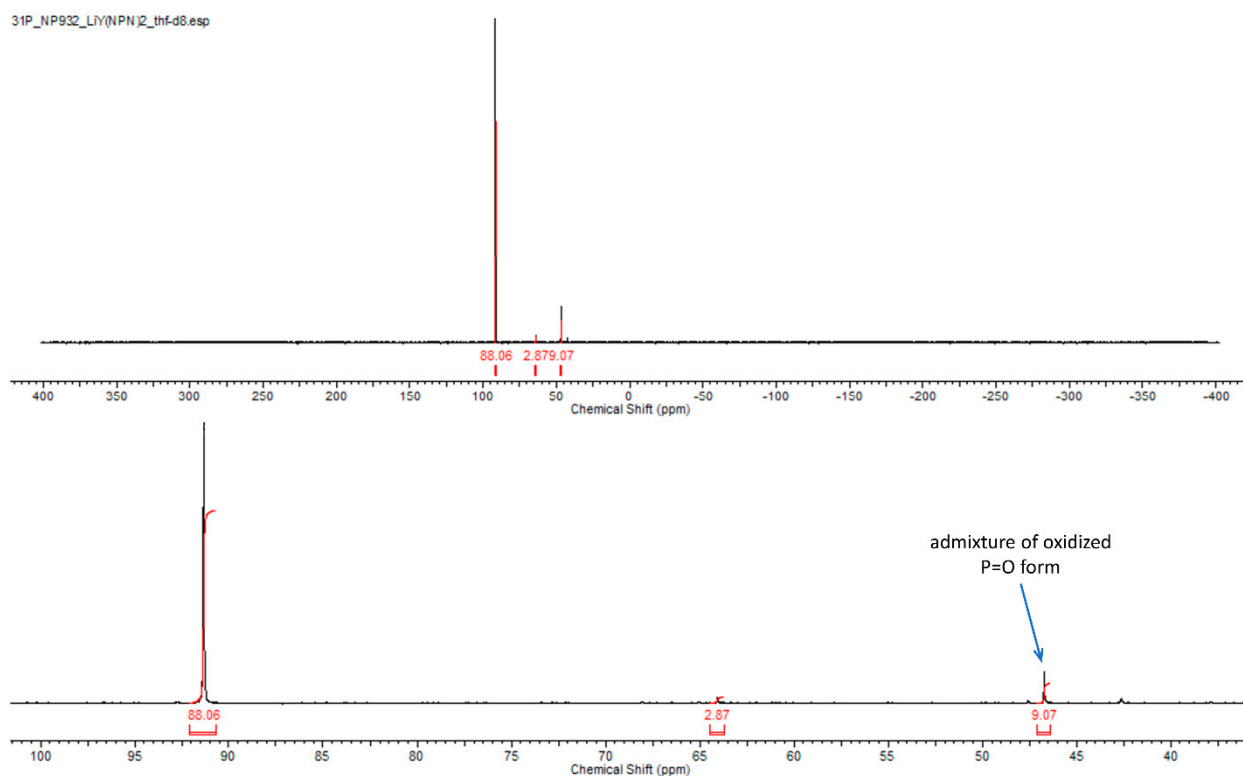

Figure S15. (top)  $^{31}\text{P}$  NMR spectrum of  $[\text{Li}(\text{thf})_4][\text{YL}_2]$  (**6**), solution in thf-d8; (bottom) enlarged view of the central part of the spectrum.

### IR spectra of the compounds

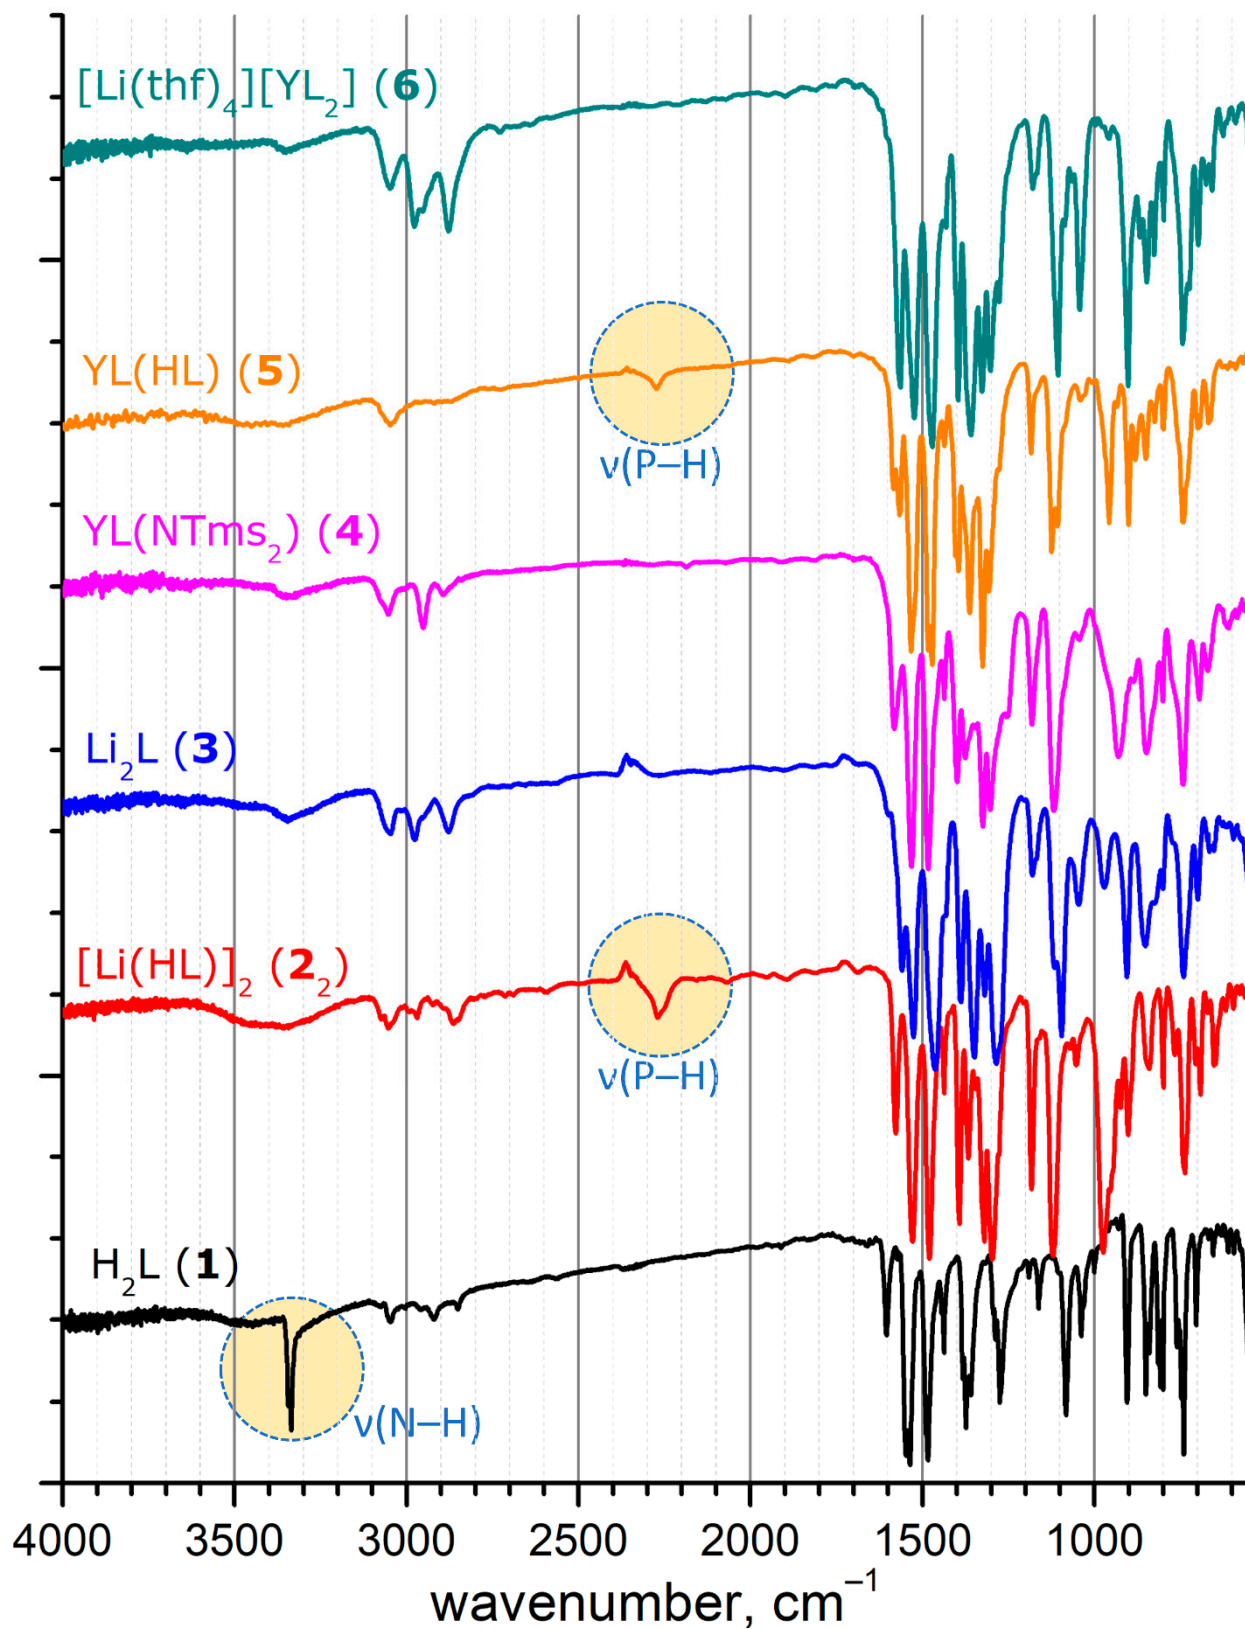

Figure S16. IR spectra of the compounds under study (4000–550  $\text{cm}^{-1}$ ), in KBr pellets. Characteristic NH and PH peaks are highlighted.

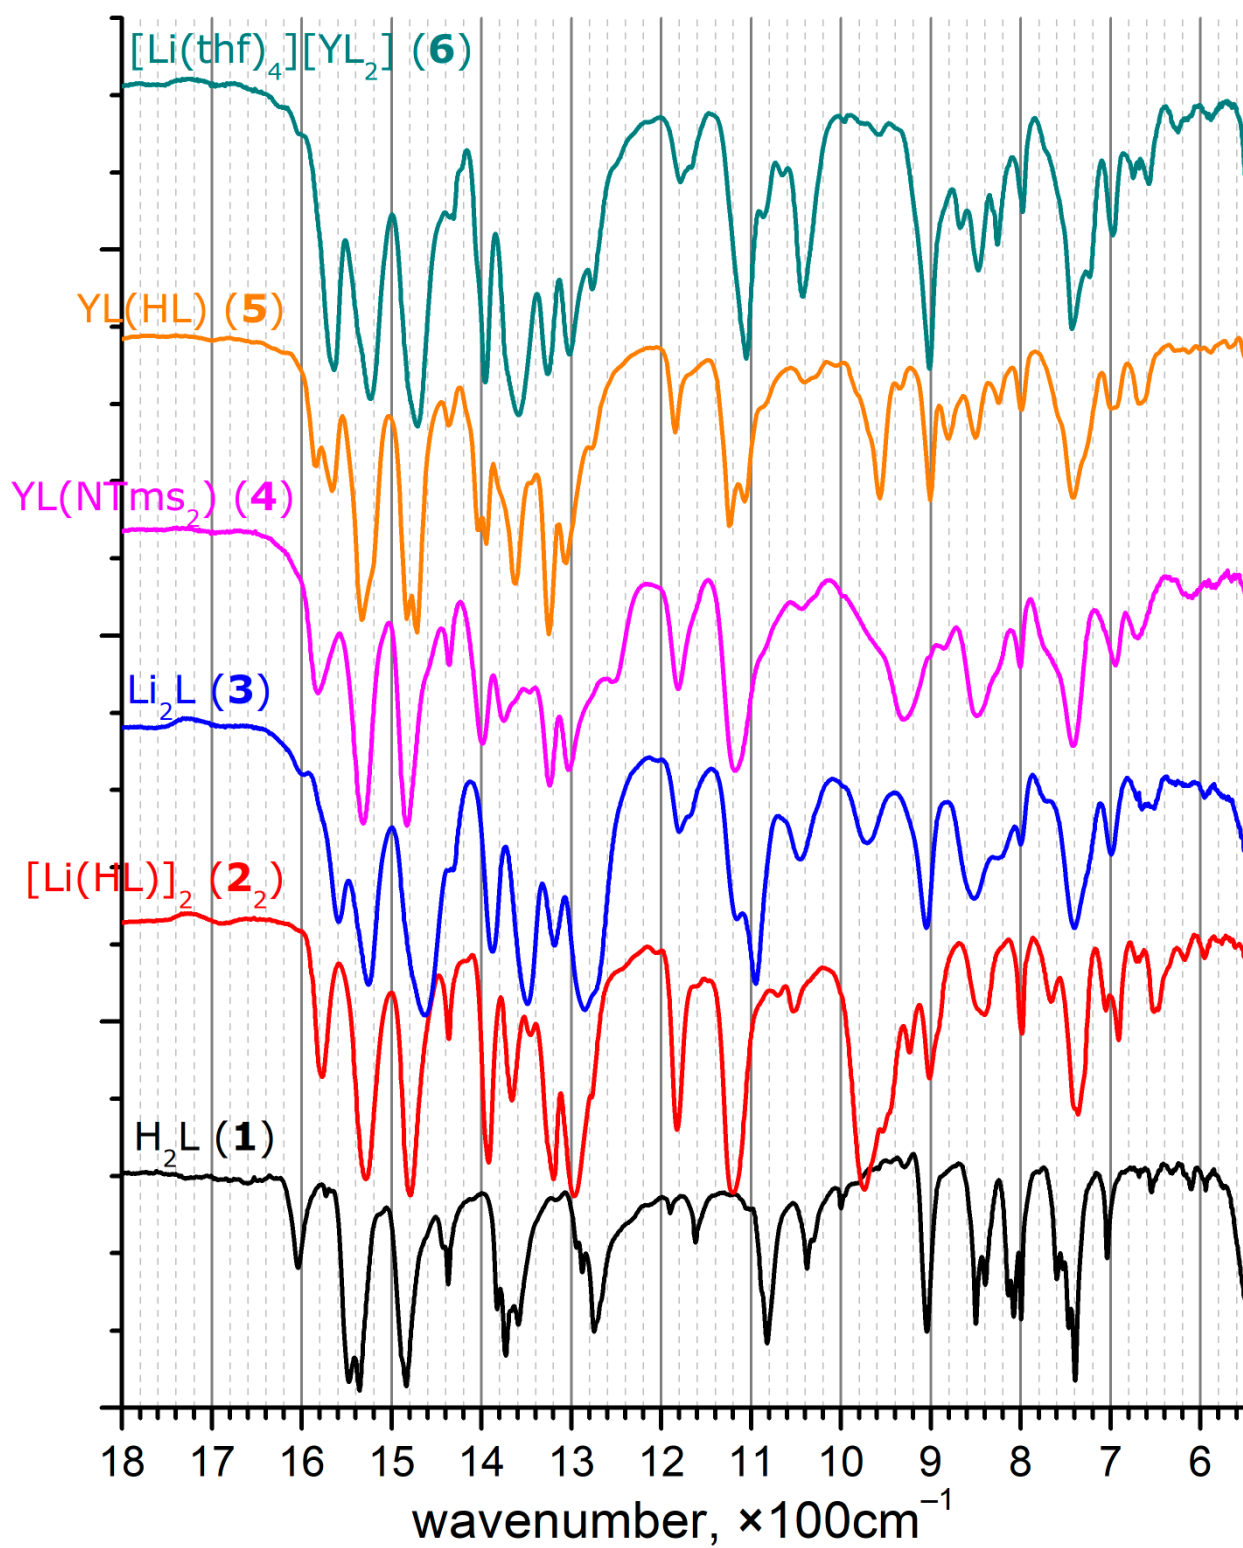

Figure S17. Fingerprint region of the IR spectra above (1800–550  $\text{cm}^{-1}$ ), in KBr pellets.
